# Supplementary material for: Validation of a Multi-Residue Analysis Method for 287 Pesticides in Citrus Fruits Mandarin Orange and Grapefruit Using Liquid Chromatography–Tandem Mass Spectrometry
Source: MDPI journal article supplement (doi:10.3390/foods11213522), 2022-11-04
Supplement: s1 [file s1]

**Table S1.** Method validation data for pesticide residue analysis in mandarin orange

| No. | Compound name               | LOQ<br>(µg/kg) | $R^2$  | Linear<br>range<br>(µg/kg) | Low                      |               |          | High                     |               |          | Matrix<br>effect<br>% |
|-----|-----------------------------|----------------|--------|----------------------------|--------------------------|---------------|----------|--------------------------|---------------|----------|-----------------------|
|     |                             |                |        |                            | Fortification<br>(µg/kg) | Recovery<br>% | RSD<br>% | Fortification<br>(µg/kg) | Recovery<br>% | RSD<br>% |                       |
| 1   | 2,3,5-trimethacarb          | 1              | 0.9997 | 0.5–50                     | 1                        | 84.6          | 15.6     | 50                       | 95.8          | 2.4      | −1.41                 |
| 2   | 3,4,5-trimethacarb          | 2.5            | 0.9997 | 0.5–50                     | 2.5                      | 87.8          | 3.5      | 50                       | 99.3          | 0.4      | 5.56                  |
| 3   | Abamectin                   | 2.5            | 0.9896 | 0.5–50                     | 2.5                      | 102.7         | 15.6     | 50                       | 95.6          | 10.8     | −9.21                 |
| 4   | Acetamiprid                 | 1              | 0.9988 | 0.5–50                     | 1                        | 104.5         | 18       | 50                       | 102.3         | 1.4      | −31.56                |
| 5   | Alachlor                    | 1              | 0.9996 | 2–50                       | 1                        | 104           | 14.2     | 50                       | 97.1          | 1        | −4.16                 |
| 6   | Aldicarb sulfoxide          | 1              | 0.999  | 0.5–50                     | 1                        | 80.2          | 7.1      | 50                       | 84.4          | 4.5      | −7.79                 |
| 7   | Alidcarb sulfone            | 2.5            | 0.9998 | 1–50                       | 2.5                      | 97.9          | 1.7      | 50                       | 91.1          | 2        | −13.27                |
| 8   | Ametoctradin                | 2.5            | 0.999  | 0.5–50                     | 2.5                      | 86.1          | 3.9      | 50                       | 98.6          | 0.1      | 3.79                  |
| 9   | Ametryn                     | 1              | 0.9996 | 2–50                       | 1                        | 85.8          | 11.5     | 50                       | 101.3         | 7.2      | 3.79                  |
| 10  | Anilofos                    | 2.5            | 0.999  | 0.5–50                     | 2.5                      | 79            | 10.8     | 50                       | 100.6         | 1.8      | −3.73                 |
| 11  | Aramite                     | 1              | 0.9992 | 0.5–50                     | 1                        | 86.3          | 7        | 50                       | 97.6          | 2.8      | −3.98                 |
| 12  | Aspon                       | 2.5            | 0.9999 | 0.5–50                     | 2.5                      | 94.3          | 6.3      | 50                       | 95.6          | 0.8      | −2.36                 |
| 13  | Atrazine                    | 1              | 0.9994 | 0.5–50                     | 1                        | 79.7          | 15       | 50                       | 101.6         | 0.4      | 4.88                  |
| 14  | Azaconazole                 | 2.5            | 0.9994 | 0.5–50                     | 2.5                      | 107.6         | 7.2      | 50                       | 99.5          | 3.1      | 15.29                 |
| 15  | Azamethiophos               | 2.5            | 0.9987 | 0.5–50                     | 2.5                      | 84.6          | 5.4      | 50                       | 98.7          | 2.7      | −4.51                 |
| 16  | Azimsulfuron                | 2.5            | 0.9996 | 0.5–50                     | 2.5                      | 85.3          | 8.8      | 50                       | 83.6          | 0.2      | 7.86                  |
| 17  | Azoxystrobin                | 2.5            | 0.9995 | 0.5–50                     | 2.5                      | 95.8          | 5.2      | 50                       | 96.1          | 4.5      | −4.37                 |
| 18  | Benalaxyl                   | 5              | 0.9969 | 0.5–50                     | 5                        | 104.3         | 11       | 50                       | 101.7         | 1.8      | −4.86                 |
| 19  | Bendiocarb                  | 5              | 0.9984 | 0.5–50                     | 5                        | 114.4         | 4.5      | 50                       | 103.7         | 2.3      | 8.91                  |
| 20  | Benoxacor                   | 2.5            | 0.9991 | 0.5–50                     | 2.5                      | 82.9          | 9        | 50                       | 100           | 1.7      | 2.13                  |
| 21  | Bensulfuron-methyl          | 1              | 0.9985 | 0.5–50                     | 1                        | 110.3         | 10.4     | 50                       | 93.3          | 2.4      | −8.94                 |
| 22  | Bensulide                   | 5              | 0.9945 | 0.5–50                     | 5                        | 98.3          | 17.8     | 50                       | 100.5         | 6.3      | −15.09                |
| 23  | Benthiavalicarb-isopropyl   | 2.5            | 0.9998 | 0.5–50                     | 2.5                      | 111.1         | 2.9      | 50                       | 97            | 2.7      | −7.36                 |
| 24  | Benzobicyclon               | 2.5            | 0.9999 | 0.5–50                     | 2.5                      | 105.3         | 7        | 50                       | 102.9         | 13.2     | 3.16                  |
| 25  | Benzoylprop-ethyl           | 2.5            | 0.9992 | 0.5–50                     | 2.5                      | 86.7          | 2.8      | 50                       | 97.9          | 4.6      | −12.92                |
| 26  | Bitertanol                  | 5              | 0.9934 | 0.5–50                     | 5                        | 113.3         | 12.4     | 50                       | 80.7          | 2.4      | 5.95                  |
| 27  | Bixafen                     | 2.5            | 0.9998 | 0.5–50                     | 2.5                      | 98.7          | 5.5      | 50                       | 92.8          | 1.4      | 3.15                  |
| 28  | Boscalid                    | 2.5            | 1      | 0.5–50                     | 2.5                      | 107.8         | 7.4      | 50                       | 90.5          | 4.2      | 1.79                  |
| 29  | Broflanilide                | 1              | 0.9978 | 0.5–50                     | 1                        | 95.3          | 17.3     | 50                       | 86.2          | 3.1      | −15.07                |
| 30  | Broflanilide DM-8007        | 5              | 0.9933 | 0.5–50                     | 5                        | 103.1         | 7.7      | 50                       | 107           | 0.1      | −0.93                 |
| 31  | Broflanilide S(PFP-OH)-8007 | 5              | 0.997  | 0.5–50                     | 5                        | 112.3         | 13.9     | 50                       | 90.9          | 4.5      | 21.66                 |
| 32  | Bromacil                    | 2.5            | 0.9992 | 0.5–50                     | 2.5                      | 85            | 5.6      | 50                       | 98.4          | 0.8      | −3.17                 |
| 33  | Bromobutide                 | 1              | 0.9996 | 0.5–50                     | 1                        | 80.9          | 16.3     | 50                       | 98.7          | 2.4      | −2.9                  |
| 34  | Bupirimate                  | 2.5            | 0.9969 | 0.5–50                     | 2.5                      | 91.4          | 7.2      | 50                       | 100           | 1.4      | 0.75                  |
| 35  | Buprofezin                  | 2.5            | 0.9995 | 0.5–50                     | 2.5                      | 104.8         | 0.2      | 50                       | 96.7          | 1.6      | −10.06                |
| 36  | Cadusafos                   | 5              | 0.9958 | 0.5–50                     | 5                        | 99.3          | 0.9      | 50                       | 100.5         | 1.2      | 2.33                  |
| 37  | Carbaryl                    | 5              | 0.9953 | 0.5–50                     | 5                        | 86            | 8.1      | 50                       | 101.5         | 2.7      | 6.38                  |
| 38  | Carbetamide                 | 2.5            | 0.9998 | 0.5–50                     | 2.5                      | 105.6         | 7.5      | 50                       | 99.6          | 2.2      | −7.68                 |

|    |                          |     |        |        |     |       |      |    |       |     |        |
|----|--------------------------|-----|--------|--------|-----|-------|------|----|-------|-----|--------|
| 39 | Carbofuran               | 2.5 | 0.9993 | 0.5–50 | 2.5 | 87.7  | 3.8  | 50 | 98.1  | 0.5 | –18.41 |
| 40 | Carboxin                 | 2.5 | 0.9996 | 0.5–50 | 2.5 | 97.7  | 4.1  | 50 | 91.5  | 4.1 | 6.59   |
| 41 | Carfentrazone-ethyl      | 2.5 | 0.9999 | 0.5–50 | 2.5 | 100.9 | 6.4  | 50 | 89.3  | 1.8 | 3.35   |
| 42 | Carpropamid              | 2.5 | 0.9963 | 0.5–50 | 2.5 | 115.2 | 4.2  | 50 | 99.4  | 1.7 | –4.73  |
| 43 | Chlorantraniliprole      | 2.5 | 0.9981 | 0.5–50 | 2.5 | 97.3  | 7.4  | 50 | 101.1 | 2.4 | 1.1    |
| 44 | Chlorbenzuron            | 5   | 0.9983 | 0.5–50 | 5   | 93.7  | 3.3  | 50 | 106.8 | 7.1 | –5.59  |
| 45 | Chlorfenvinphos          | 1   | 0.9993 | 0.5–50 | 1   | 84.1  | 12   | 50 | 98.9  | 2   | –7.37  |
| 46 | Chlorimuron-ethyl        | 1   | 0.9982 | 0.5–50 | 1   | 83.9  | 18.7 | 50 | 86.5  | 2.4 | 12.26  |
| 47 | Chlorotoluron            | 5   | 0.9982 | 0.5–50 | 5   | 105   | 8.4  | 50 | 101.4 | 1   | –13.86 |
| 48 | Chloroxuron              | 1   | 0.9995 | 0.5–50 | 1   | 103.5 | 3    | 50 | 92.2  | 2.5 | –5.73  |
| 49 | Chlorpyrifos             | 2.5 | 0.9992 | 0.5–50 | 2.5 | 112.6 | 5.9  | 50 | 93.2  | 0.2 | 2.68   |
| 50 | Chlorpyrifos-methyl      | 2.5 | 0.9985 | 0.5–50 | 2.5 | 87.9  | 14.2 | 50 | 98.5  | 2.4 | –11.14 |
| 51 | Chromafenozide           | 2.5 | 0.9964 | 0.5–50 | 2.5 | 118.1 | 9.2  | 50 | 106.1 | 8.2 | –8.2   |
| 52 | Clethodim                | 10  | 0.9961 | 1–50   | 10  | 99    | 8.6  | 50 | 96.6  | 1.1 | –44.98 |
| 53 | Clofentezine             | 2.5 | 0.9998 | 0.5–50 | 2.5 | 82.1  | 11.7 | 50 | 96.8  | 1.1 | 3.08   |
| 54 | Clomazone                | 1   | 1      | 0.5–50 | 1   | 104.4 | 13.5 | 50 | 96    | 2.3 | 16.55  |
| 55 | Clothianidin             | 2.5 | 0.9995 | 0.5–50 | 2.5 | 91.5  | 19.6 | 50 | 91.9  | 4.9 | –13.05 |
| 56 | Coumaphos                | 2.5 | 0.9967 | 0.5–50 | 2.5 | 82    | 7.5  | 50 | 98.8  | 3.2 | –8.47  |
| 57 | Crufomate                | 5   | 0.9934 | 0.5–50 | 5   | 94    | 10.3 | 50 | 104.2 | 2.5 | –1.83  |
| 58 | Cyanazine                | 2.5 | 0.9974 | 0.5–50 | 2.5 | 110   | 3.4  | 50 | 94.5  | 2.3 | 13.19  |
| 59 | Cyazofamid               | 2.5 | 0.9965 | 0.5–50 | 2.5 | 100.2 | 10.4 | 50 | 106.1 | 0.9 | –5.96  |
| 60 | Cyclosulfamuron          | 2.5 | 0.9987 | 0.5–50 | 2.5 | 95.9  | 10.8 | 50 | 92.4  | 2.1 | 4.93   |
| 61 | Cyflufenamid             | 2.5 | 0.9998 | 0.5–50 | 2.5 | 109.9 | 14.2 | 50 | 102.9 | 2.2 | –2.34  |
| 62 | Cyprazine                | 2.5 | 0.9989 | 0.5–50 | 2.5 | 73.7  | 14   | 50 | 104.3 | 3.4 | 9.32   |
| 63 | Cyprodinil               | 5   | 0.9988 | 2–50   | 5   | 97.8  | 10.9 | 50 | 98.2  | 1.9 | –2.83  |
| 64 | Daimuron                 | 2.5 | 0.999  | 0.5–50 | 2.5 | 114.3 | 1.5  | 50 | 95.9  | 3.8 | 0.49   |
| 65 | Demeton-O                | 1   | 0.9991 | 0.5–50 | 1   | 114.7 | 1.8  | 50 | 96.2  | 3.5 | 18.84  |
| 66 | Demeton-S                | 1   | 0.9975 | 0.5–50 | 1   | 77.1  | 4.2  | 50 | 102.4 | 0.7 | –10.75 |
| 67 | Demeton-S-methyl-sulfone | 1   | 0.9998 | 0.5–50 | 1   | 114.6 | 15.4 | 50 | 93.7  | 1.3 | –2.08  |
| 68 | Desmetryn                | 2.5 | 0.9996 | 0.5–50 | 2.5 | 110.3 | 3.5  | 50 | 96.8  | 1.9 | 10.19  |
| 69 | Diazinon                 | 1   | 0.9998 | 0.5–50 | 1   | 86.8  | 2.7  | 50 | 101.4 | 2.9 | –6.45  |
| 70 | Dichlorvos               | 10  | 0.9989 | 0.5–50 | 10  | 84    | 13   | 50 | 103.7 | 4.3 | 0.46   |
| 71 | Diclobutrazol            | 2.5 | 0.9999 | 0.5–50 | 2.5 | 97.4  | 19.1 | 50 | 109.5 | 1.1 | –5.35  |
| 72 | Dicrotophos              | 2.5 | 0.9971 | 0.5–50 | 2.5 | 77.5  | 14.7 | 50 | 101.4 | 1.5 | –14.18 |
| 73 | Diethatyl-ethyl          | 2.5 | 0.9979 | 0.5–50 | 2.5 | 82.5  | 3.3  | 50 | 101.2 | 1   | –2.33  |
| 74 | Diethofencarb            | 1   | 0.9994 | 0.5–50 | 1   | 85.2  | 4.9  | 50 | 96.2  | 0.6 | 1.07   |
| 75 | Difenoconazole           | 1   | 0.9999 | 0.5–50 | 1   | 99    | 12.5 | 50 | 100.6 | 1.7 | 3.73   |
| 76 | Diflubenzuron            | 2.5 | 0.9987 | 0.5–50 | 2.5 | 84.9  | 4.5  | 50 | 100.4 | 1.5 | 6.24   |
| 77 | Diflufenican             | 2.5 | 0.9998 | 0.5–50 | 2.5 | 110.8 | 6.8  | 50 | 98.3  | 2.4 | –0.39  |
| 78 | Dimethachlor             | 1   | 0.9999 | 0.5–50 | 1   | 101.3 | 9.6  | 50 | 98.2  | 0.9 | 1.16   |
| 79 | Dimethametryn            | 5   | 0.9927 | 0.5–50 | 5   | 92.9  | 11.3 | 50 | 103.1 | 2.3 | –0.14  |
| 80 | Dimethenamide            | 2.5 | 0.9942 | 0.5–50 | 2.5 | 71.3  | 20   | 50 | 99.7  | 4.2 | –3.61  |
| 81 | Dimethoate               | 1   | 0.9921 | 0.5–50 | 1   | 107.4 | 7.2  | 50 | 97    | 1.2 | –39.62 |
| 82 | Diniconazole             | 2.5 | 0.9998 | 0.5–50 | 2.5 | 70.4  | 5.9  | 50 | 95.1  | 3.3 | 1.92   |
| 83 | Dinotefuran              | 2.5 | 0.9989 | 1–50   | 2.5 | 108   | 16.4 | 50 | 86    | 2   | –19.33 |
| 84 | Diphenamid               | 2.5 | 0.9927 | 0.5–50 | 2.5 | 113.9 | 3.1  | 50 | 82.8  | 1.8 | 2.95   |
| 85 | Dithiopyr                | 1   | 0.9999 | 0.5–50 | 1   | 118.4 | 14.4 | 50 | 98.4  | 3.5 | –2.89  |

|     |                         |     |        |        |     |       |      |    |       |     |        |
|-----|-------------------------|-----|--------|--------|-----|-------|------|----|-------|-----|--------|
| 86  | Diuron                  | 1   | 0.9993 | 0.5–50 | 1   | 101.8 | 13.9 | 50 | 99.4  | 0.8 | 19.87  |
| 87  | Edifenphos              | 2.5 | 0.9941 | 0.5–50 | 2.5 | 70.8  | 7.5  | 50 | 98.5  | 5.9 | –6.49  |
| 88  | Epoxiconazole           | 5   | 0.997  | 0.5–50 | 5   | 89.6  | 6.1  | 50 | 97.9  | 3.5 | –3.01  |
| 89  | Esprocarb               | 2.5 | 0.999  | 0.5–50 | 2.5 | 93.7  | 3.5  | 50 | 99.9  | 2.2 | 12.57  |
| 90  | Etaconazole             | 1   | 0.9996 | 0.5–50 | 1   | 99.4  | 2.1  | 50 | 95.2  | 4.9 | 0.14   |
| 91  | Ethaboxam               | 2.5 | 0.9992 | 0.5–50 | 2.5 | 108.5 | 4.6  | 50 | 95.6  | 1.1 | –6.55  |
| 92  | Ethiofencarb            | 1   | 0.9997 | 0.5–50 | 1   | 114   | 15.5 | 50 | 98.4  | 1.1 | 4.8    |
| 93  | Ethirimol               | 2.5 | 0.9999 | 0.5–50 | 2.5 | 97.8  | 14.1 | 50 | 93.1  | 1.8 | –4.27  |
| 94  | Ethoprophos             | 2.5 | 0.9984 | 0.5–50 | 2.5 | 81.2  | 5.6  | 50 | 94.6  | 3.3 | 5.48   |
| 95  | Etofenprox              | 5   | 0.9995 | 0.5–50 | 5   | 108.6 | 2.7  | 50 | 93.7  | 1.8 | 2.34   |
| 96  | Etoazole                | 1   | 0.9993 | 0.5–50 | 1   | 102.8 | 4.9  | 50 | 79.1  | 1   | –6.84  |
| 97  | Etrimfos                | 2.5 | 0.9985 | 0.5–50 | 2.5 | 86.2  | 3.1  | 50 | 97.6  | 3.9 | –6.59  |
| 98  | Famoxadone              | 2.5 | 0.9963 | 0.5–50 | 2.5 | 100   | 8.9  | 50 | 84.3  | 0.7 | 19.81  |
| 99  | Fenamiphos              | 2.5 | 0.9983 | 0.5–50 | 2.5 | 77.9  | 5.7  | 50 | 104.4 | 3.8 | –0.86  |
| 100 | Fenamiphos sulfone      | 2.5 | 0.9994 | 0.5–50 | 2.5 | 100.5 | 11.6 | 50 | 105.3 | 4   | 15.42  |
| 101 | Fenamiphos sulfoxide    | 1   | 0.9998 | 0.5–50 | 1   | 79.8  | 14.1 | 50 | 93.9  | 0.7 | –0.79  |
| 102 | Fenarimol               | 1   | 0.997  | 0.5–50 | 1   | 105.5 | 13.2 | 50 | 93.9  | 2.3 | –4.77  |
| 103 | Fenbuconazole           | 2.5 | 0.9985 | 1–50   | 2.5 | 94.9  | 14.2 | 50 | 94.8  | 5   | –9.2   |
| 104 | Fenfuram                | 2.5 | 0.9985 | 0.5–50 | 2.5 | 78.6  | 13.6 | 50 | 102.3 | 1.1 | –1.78  |
| 105 | Fenobucarb              | 2.5 | 0.9968 | 0.5–50 | 2.5 | 90.8  | 8.1  | 50 | 109.9 | 3.8 | 10.87  |
| 106 | Fenothiocarb            | 2.5 | 0.9993 | 0.5–50 | 2.5 | 87.5  | 4.1  | 50 | 103.2 | 3.6 | –7.16  |
| 107 | Fenoxanil               | 1   | 0.9996 | 0.5–50 | 1   | 94.2  | 4.7  | 50 | 101.8 | 3.3 | 7.85   |
| 108 | Fenoxycarb              | 1   | 0.9989 | 0.5–50 | 1   | 105.8 | 14.7 | 50 | 92.9  | 1.9 | –9.08  |
| 109 | Fenpropimorph           | 2.5 | 0.9985 | 0.5–50 | 2.5 | 79.4  | 7.6  | 50 | 99    | 3.8 | 7.03   |
| 110 | Fenpyroximate           | 1   | 0.9999 | 0.5–50 | 1   | 91.2  | 4.2  | 50 | 95    | 0.6 | –0.31  |
| 111 | Fenthion                | 2.5 | 0.9984 | 0.5–50 | 2.5 | 84.5  | 10.7 | 50 | 102   | 3.4 | –10.04 |
| 112 | Fenthion oxon           | 1   | 0.9995 | 0.5–50 | 1   | 98.6  | 5.7  | 50 | 102.2 | 0.5 | –5.16  |
| 113 | Fenthion oxon sulfone   | 1   | 0.9988 | 0.5–50 | 1   | 98.6  | 11.7 | 50 | 97.7  | 1.3 | –12.94 |
| 114 | Fenthion oxon sulfoxide | 2.5 | 0.9998 | 0.5–50 | 2.5 | 99    | 16   | 50 | 94.2  | 2.9 | –31.85 |
| 115 | Fenthion sulfoxide      | 1   | 0.9994 | 0.5–50 | 1   | 74.7  | 17.4 | 50 | 101.5 | 2.1 | –1.1   |
| 116 | Fenthion-sulfone        | 5   | 0.9988 | 1–50   | 5   | 92    | 7    | 50 | 86.4  | 6   | –3.08  |
| 117 | Ferimzone               | 2.5 | 0.9983 | 1–50   | 2.5 | 77.5  | 6.4  | 50 | 104.1 | 2.3 | –2.35  |
| 118 | Fipronil                | 2.5 | 0.9973 | 0.5–50 | 2.5 | 112.7 | 16.5 | 50 | 99.7  | 0.5 | –1.12  |
| 119 | Fipronil-sulfone        | 2.5 | 0.999  | 0.5–50 | 2.5 | 109.5 | 2    | 50 | 99.9  | 1.7 | –6.1   |
| 120 | Flamprop-isopropyl      | 1   | 0.9993 | 0.5–50 | 1   | 88.9  | 10.5 | 50 | 98.6  | 1.9 | –13.69 |
| 121 | Flonicamid              | 1   | 0.9999 | 0.5–50 | 1   | 111.2 | 4.3  | 50 | 88.6  | 2.9 | 1.52   |
| 122 | Fluazinam               | 1   | 0.9999 | 0.5–50 | 1   | 116.3 | 1.7  | 50 | 91.7  | 1.9 | –6.42  |
| 123 | Flucetosulfuron         | 2.5 | 0.9978 | 0.5–50 | 2.5 | 84.2  | 9.8  | 50 | 82.4  | 0.7 | –0.16  |
| 124 | Fludioxonil             | 2.5 | 0.9987 | 0.5–50 | 2.5 | 109.7 | 5.2  | 50 | 96.3  | 0.5 | –9.96  |
| 125 | Flufenacet              | 1   | 0.9996 | 0.5–50 | 1   | 82.1  | 2.2  | 50 | 100.6 | 4.2 | –11.78 |
| 126 | Flufenoxuron            | 1   | 0.9997 | 0.5–50 | 1   | 91    | 5.5  | 50 | 95.4  | 1.5 | –1.11  |
| 127 | Fluometuron             | 5   | 0.999  | 2–50   | 5   | 108.2 | 4.1  | 50 | 95.3  | 5   | 1.63   |
| 128 | Fluopicolide            | 1   | 0.9994 | 0.5–50 | 1   | 104.4 | 2.4  | 50 | 96.8  | 1   | –5.46  |
| 129 | Fluopyram               | 1   | 0.9992 | 0.5–50 | 1   | 101   | 4.3  | 50 | 95.1  | 0.5 | 10.26  |
| 130 | Flupyradifuron          | 1   | 0.9989 | 0.5–50 | 1   | 81.4  | 9.9  | 50 | 105.7 | 5.5 | –18.47 |
| 131 | Fluquinconazole         | 2.5 | 0.9998 | 0.5–50 | 2.5 | 114.9 | 15   | 50 | 96.3  | 5.2 | –5.63  |
| 132 | Fluridone               | 5   | 0.9976 | 0.5–50 | 5   | 100.7 | 2.1  | 50 | 105.2 | 1.2 | –13.84 |

|     |                      |     |        |        |     |       |      |    |       |     |        |
|-----|----------------------|-----|--------|--------|-----|-------|------|----|-------|-----|--------|
| 133 | Flurochloridone      | 2.5 | 0.9994 | 0.5–50 | 2.5 | 111.2 | 12.3 | 50 | 103.8 | 3.2 | 3.98   |
| 134 | Flurtamone           | 2.5 | 0.9959 | 0.5–50 | 2.5 | 71.6  | 5.7  | 50 | 103   | 0.6 | –4.09  |
| 135 | Flusilazole          | 1   | 0.9996 | 0.5–50 | 1   | 100.3 | 6.8  | 50 | 93.9  | 1.2 | –5.78  |
| 136 | Fluthiacet-methyl    | 2.5 | 0.9975 | 0.5–50 | 2.5 | 113.8 | 6.5  | 50 | 90    | 3.6 | 7.48   |
| 137 | Flutianil            | 1   | 0.9987 | 0.5–50 | 1   | 111.2 | 2.6  | 50 | 96.6  | 1   | –2.08  |
| 138 | Flutolanil           | 2.5 | 0.9985 | 0.5–50 | 2.5 | 80.5  | 7    | 50 | 96    | 2.7 | 44.13  |
| 139 | Flutriafol           | 2.5 | 0.9923 | 0.5–50 | 2.5 | 109.8 | 7    | 50 | 96.1  | 5   | –12.44 |
| 140 | Fluxapyroxad         | 2.5 | 0.9975 | 0.5–50 | 2.5 | 96.7  | 10.6 | 50 | 98.7  | 2.4 | –7.98  |
| 141 | Fosthiazate          | 1   | 1      | 0.5–50 | 1   | 101.8 | 4.6  | 50 | 97.7  | 1   | –10.18 |
| 142 | Furathiocarb         | 1   | 0.9998 | 0.5–50 | 1   | 114.7 | 9.9  | 50 | 96    | 1.7 | 18.79  |
| 143 | Heptenophos          | 1   | 0.999  | 2–50   | 1   | 80.3  | 3.3  | 50 | 98    | 0.8 | 7.96   |
| 144 | Hexaflumuron         | 5   | 0.9972 | 0.5–50 | 5   | 102.4 | 1.5  | 50 | 104.1 | 3   | –5.76  |
| 145 | Hexazinone           | 2.5 | 0.993  | 0.5–50 | 2.5 | 73.1  | 0.7  | 50 | 102.7 | 2.2 | 1.33   |
| 146 | Hexythiazox          | 1   | 0.9998 | 0.5–50 | 1   | 115.6 | 9.7  | 50 | 93    | 1.3 | 2.88   |
| 147 | Imibenconazole       | 2.5 | 0.9973 | 1–50   | 2.5 | 119.9 | 11.2 | 50 | 94.4  | 0.6 | 1.34   |
| 148 | Imicyafos            | 2.5 | 0.9972 | 0.5–50 | 2.5 | 99.2  | 7.5  | 50 | 92.1  | 4.4 | –1.65  |
| 149 | Imidacloprid         | 1   | 0.9993 | 0.5–50 | 1   | 88.4  | 7    | 50 | 93.6  | 3.8 | 20.06  |
| 150 | Inabenfide           | 1   | 0.9997 | 0.5–50 | 1   | 108.9 | 14.7 | 50 | 95.7  | 2.8 | –0.72  |
| 151 | Indanofan            | 2.5 | 0.9995 | 0.5–50 | 2.5 | 96    | 19.5 | 50 | 96.7  | 2.9 | –7.64  |
| 152 | Ipconazole           | 2.5 | 0.9998 | 0.5–50 | 2.5 | 101.7 | 5.7  | 50 | 90.3  | 0.8 | –0.38  |
| 153 | Iprobenfos           | 1   | 0.9983 | 2–50   | 1   | 83.1  | 10.4 | 50 | 98.6  | 2.5 | –17.43 |
| 154 | Iprovalicarb         | 2.5 | 0.9923 | 0.5–50 | 2.5 | 75.8  | 2.8  | 50 | 91.9  | 0.9 | –2.95  |
| 155 | Isoproc carb         | 5   | 0.9988 | 1–50   | 5   | 110.2 | 1.4  | 50 | 96.7  | 1.1 | 9.83   |
| 156 | Isoprothiolane       | 1   | 0.9944 | 0.5–50 | 1   | 95    | 14.2 | 50 | 103   | 2.6 | –15.24 |
| 157 | Isopyrazam           | 2.5 | 0.9995 | 0.5–50 | 2.5 | 92.2  | 5.8  | 50 | 98.4  | 1.5 | 2.21   |
| 158 | Isoxaben             | 5   | 0.9939 | 0.5–50 | 5   | 101.8 | 4.4  | 50 | 105.7 | 4.6 | –8.26  |
| 159 | Lenacil              | 5   | 0.9975 | 2–50   | 5   | 112.6 | 3.4  | 50 | 98.3  | 0.9 | 16.74  |
| 160 | Linuron              | 1   | 0.9995 | 0.5–50 | 1   | 102.7 | 16.4 | 50 | 95.7  | 3.2 | –4.74  |
| 161 | Lufenuron            | 2.5 | 0.9981 | 0.5–50 | 2.5 | 92.2  | 15.9 | 50 | 89.2  | 0.8 | –3.58  |
| 162 | Malaoxon             | 1   | 0.999  | 0.5–50 | 1   | 116.1 | 5.3  | 50 | 98    | 1.5 | 5.54   |
| 163 | Mandipropamid        | 2.5 | 0.9981 | 0.5–50 | 2.5 | 76.9  | 5.1  | 50 | 101.8 | 4.7 | –0.86  |
| 164 | Mecarbam             | 1   | 0.9988 | 0.5–50 | 1   | 71.8  | 11.8 | 50 | 103.8 | 3.6 | 0.8    |
| 165 | Mefenacet            | 1   | 0.9977 | 0.5–50 | 1   | 107.5 | 8.2  | 50 | 98.7  | 3.7 | –9.83  |
| 166 | Mepanipyrim          | 2.5 | 0.9991 | 0.5–50 | 2.5 | 101.1 | 2.2  | 50 | 99.9  | 4   | –3.67  |
| 167 | Mephosfolan          | 1   | 0.9978 | 0.5–50 | 1   | 87.4  | 4.5  | 50 | 104.5 | 0.8 | –6.58  |
| 168 | Mepronil             | 2.5 | 0.9978 | 0.5–50 | 2.5 | 76.4  | 11.5 | 50 | 98.8  | 1.6 | 3.2    |
| 169 | Metaflumizone (1)    | 5   | 0.9989 | 0.5–50 | 5   | 84.4  | 9.3  | 50 | 92.8  | 2.6 | –10.03 |
|     | Metaflumizone (2)    | 2.5 | 0.9992 | 0.5–50 | 2.5 | 80.2  | 6.5  | 50 | 88.8  | 0.4 | –10.03 |
| 170 | Metalaxyl            | 2.5 | 0.9976 | 0.5–50 | 2.5 | 92.2  | 8.2  | 50 | 97.4  | 2   | –0.14  |
| 171 | Metamifop            | 2.5 | 0.9981 | 0.5–50 | 2.5 | 79.6  | 12.7 | 50 | 96.2  | 0.5 | –9.92  |
| 172 | Metconazole          | 2.5 | 0.9989 | 0.5–50 | 2.5 | 113.9 | 6    | 50 | 92.7  | 1.2 | –3.82  |
| 173 | Methabenzthiazuron   | 5   | 0.998  | 0.5–50 | 5   | 112.7 | 13.4 | 50 | 99    | 0.4 | –22.21 |
| 174 | Methiocarb-sulfone   | 2.5 | 0.9985 | 2–50   | 2.5 | 108.9 | 7.8  | 50 | 98.8  | 0.7 | –39.35 |
| 175 | Methiocarb-sulfoxide | 1   | 0.9991 | 0.5–50 | 1   | 82.5  | 7    | 50 | 91    | 2   | 5.18   |
| 176 | Methomyl             | 2.5 | 0.9999 | 0.5–50 | 2.5 | 91.7  | 10.5 | 50 | 95.6  | 3.9 | –33.06 |
| 177 | Methoprotryne        | 2.5 | 0.9982 | 0.5–50 | 2.5 | 83.1  | 9.5  | 50 | 98.3  | 0.1 | –0.28  |
| 178 | Metobromuron         | 1   | 0.9998 | 0.5–50 | 1   | 102.4 | 9    | 50 | 99.9  | 2.1 | 0.75   |

|     |                         |     |        |        |     |       |      |    |       |     |        |
|-----|-------------------------|-----|--------|--------|-----|-------|------|----|-------|-----|--------|
| 179 | Metominostrobin (Z)     | 1   | 0.9998 | 0.5–50 | 1   | 106.9 | 2.9  | 50 | 99.7  | 2.6 | 1.8    |
| 180 | Metominostrobin (E)     | 2.5 | 0.9975 | 0.5–50 | 2.5 | 78    | 11   | 50 | 100.5 | 0.3 | –4.97  |
| 181 | Metrafenon              | 5   | 0.9996 | 0.5–50 | 5   | 93.9  | 1.5  | 50 | 96.1  | 3.2 | 2.78   |
| 182 | Mevinphos (1)           | 2.5 | 0.9993 | 0.5–50 | 2.5 | 105.1 | 7.6  | 50 | 97.9  | 1.8 | –17.41 |
|     | Mevinphos (2)           | 1   | 0.9998 | 0.5–50 | 1   | 90.3  | 9.6  | 50 | 96.6  | 3.1 | –17.41 |
| 183 | Monocrotophos           | 1   | 0.9997 | 0.5–50 | 1   | 108.9 | 10   | 50 | 97.3  | 1.3 | 1.37   |
| 184 | Myclobutanil            | 2.5 | 0.9992 | 2–50   | 2.5 | 116.5 | 13.6 | 50 | 92.5  | 1.2 | –26.58 |
| 185 | Napropamide             | 2.5 | 0.998  | 0.5–50 | 2.5 | 89.3  | 6.9  | 50 | 98.6  | 2.3 | 1.53   |
| 186 | Neburon                 | 1   | 0.9988 | 0.5–50 | 1   | 87.4  | 11.4 | 50 | 98.1  | 1.6 | –7.16  |
| 187 | Novaluron               | 2.5 | 0.9949 | 0.5–50 | 2.5 | 80.5  | 7.5  | 50 | 108.5 | 3.6 | –0.85  |
| 188 | Nuarimol                | 1   | 0.9996 | 1–50   | 1   | 86.5  | 7.2  | 50 | 95.6  | 2.4 | –2.61  |
| 189 | Ofurace                 | 2.5 | 0.9991 | 1–50   | 2.5 | 111.9 | 4.3  | 50 | 95.1  | 3   | 0.54   |
| 190 | Omethoate               | 2.5 | 0.9994 | 1–50   | 2.5 | 83.2  | 12.3 | 50 | 93.5  | 4.1 | –18.64 |
| 191 | Oxadiazon               | 2.5 | 0.9997 | 2–50   | 2.5 | 116   | 1.2  | 50 | 87.8  | 3.3 | –9.32  |
| 192 | Oxamyl                  | 2.5 | 0.9999 | 0.5–50 | 2.5 | 105.3 | 2.8  | 50 | 94.6  | 2.6 | –13.97 |
| 193 | Oxaziclomefone          | 2.5 | 0.9984 | 0.5–50 | 2.5 | 85.5  | 1    | 50 | 97.2  | 2.2 | 5.47   |
| 194 | Penconazole             | 2.5 | 0.9977 | 2–50   | 2.5 | 112.6 | 16   | 50 | 94.8  | 5.7 | –12.81 |
| 195 | Pencycuron              | 1   | 0.9988 | 0.5–50 | 1   | 97    | 2.6  | 50 | 84.4  | 4.5 | –4.42  |
| 196 | Phenthoate              | 2.5 | 0.9993 | 2–50   | 2.5 | 105.3 | 11.7 | 50 | 96.1  | 1.4 | –7.1   |
| 197 | Phosalone               | 1   | 0.9999 | 0.5–50 | 1   | 112.6 | 18.5 | 50 | 90.6  | 2.5 | –3.8   |
| 198 | Phosfolan               | 5   | 0.9988 | 0.5–50 | 5   | 106.4 | 7.5  | 50 | 101   | 2.2 | –3.61  |
| 199 | Phosmet-oxon            | 2.5 | 0.9988 | 0.5–50 | 2.5 | 86.6  | 11.5 | 50 | 100   | 2.6 | –7.14  |
| 200 | Phosphamidon            | 1   | 0.9998 | 0.5–50 | 1   | 100.6 | 3.8  | 50 | 98    | 1.2 | 17.61  |
| 201 | Phoxim                  | 2.5 | 0.9977 | 2–50   | 2.5 | 84.4  | 10.1 | 50 | 99.4  | 2.6 | –5.28  |
| 202 | Picolinafen             | 1   | 1      | 0.5–50 | 1   | 104.1 | 8.1  | 50 | 97.3  | 0.9 | 0.8    |
| 203 | Pinoxaden               | 5   | 0.9933 | 0.5–50 | 5   | 90.9  | 16.6 | 50 | 102   | 1.7 | –0.05  |
| 204 | Piperonyl butoxide      | 2.5 | 0.9987 | 0.5–50 | 2.5 | 90.3  | 5.5  | 50 | 99.1  | 2.8 | 3.12   |
| 205 | Piperophos              | 2.5 | 0.9997 | 0.5–50 | 2.5 | 105.8 | 4.4  | 50 | 99.5  | 0.8 | –1.3   |
| 206 | Pirimicarb              | 2.5 | 0.9994 | 0.5–50 | 2.5 | 88.2  | 0.1  | 50 | 100.4 | 0.3 | –1.25  |
| 207 | Pirimicarb-desmethyl    | 1   | 0.999  | 0.5–50 | 1   | 116.9 | 0.9  | 50 | 95.7  | 2.7 | –22.24 |
| 208 | Pirimiphos-ethyl        | 1   | 0.9992 | 0.5–50 | 1   | 87.5  | 6.5  | 50 | 81.3  | 0.6 | –3.01  |
| 209 | Pirimiphos-methyl       | 2.5 | 0.9985 | 0.5–50 | 2.5 | 88.4  | 3.3  | 50 | 102   | 1.6 | –7.23  |
| 210 | Prochloraz              | 1   | 0.9998 | 2–50   | 1   | 90.3  | 6.2  | 50 | 95.5  | 3   | –4.43  |
| 211 | Profenofos              | 1   | 0.9999 | 0.5–50 | 1   | 89.4  | 1.3  | 50 | 97.5  | 0.9 | 3.8    |
| 212 | Promecarb               | 2.5 | 0.9984 | 0.5–50 | 2.5 | 86    | 10.7 | 50 | 93.8  | 3.8 | 9.16   |
| 213 | Prometryn               | 5   | 0.9963 | 0.5–50 | 5   | 95.4  | 3.9  | 50 | 98.4  | 4   | –1.77  |
| 214 | Pronamide (Propyzamide) | 1   | 0.9989 | 0.5–50 | 1   | 89.7  | 16.2 | 50 | 96.2  | 4.8 | –4.6   |
| 215 | Propachlor              | 1   | 0.9997 | 0.5–50 | 1   | 88.6  | 17.3 | 50 | 98    | 0.9 | 10.74  |
| 216 | Propamocarb             | 1   | 0.9998 | 0.5–50 | 1   | 76.1  | 3.6  | 50 | 88.3  | 0.7 | –13.36 |
| 217 | Propanil                | 1   | 0.9996 | 2–50   | 1   | 113.7 | 18.7 | 50 | 97.7  | 0.1 | –6.43  |
| 218 | Propaquizafop           | 1   | 0.9997 | 0.5–50 | 1   | 84.3  | 13.7 | 50 | 95.6  | 0.7 | 4.02   |
| 219 | Propargite              | 2.5 | 0.9998 | 0.5–50 | 2.5 | 107.4 | 2.2  | 50 | 96.1  | 1.3 | –5.35  |
| 220 | Propazine               | 2.5 | 0.9991 | 0.5–50 | 2.5 | 92.9  | 7.8  | 50 | 96.9  | 2.5 | 11.83  |
| 221 | Propiconazole           | 5   | 0.9991 | 2–50   | 5   | 105.8 | 11.9 | 50 | 97    | 1.8 | –2.88  |
| 222 | Propoxur                | 2.5 | 0.998  | 0.5–50 | 2.5 | 83.5  | 3.9  | 50 | 106   | 4.1 | 5.62   |
| 223 | Proquinazid             | 1   | 0.9993 | 0.5–50 | 1   | 87.5  | 3.1  | 50 | 97.1  | 0.3 | –3.91  |
| 224 | Prothioconazole         | 2.5 | 0.9987 | 2–50   | 2.5 | 100.5 | 2.7  | 50 | 103.4 | 1.5 | 1.35   |

|     |                           |     |        |        |     |       |      |    |       |     |        |
|-----|---------------------------|-----|--------|--------|-----|-------|------|----|-------|-----|--------|
| 225 | Prothioconazole-desthio   | 1   | 0.9977 | 2–50   | 1   | 75.6  | 16.2 | 50 | 111.4 | 1.1 | –9.01  |
| 226 | Pydiflumetofen            | 2.5 | 0.9988 | 0.5–50 | 2.5 | 97    | 6    | 50 | 101.4 | 2.6 | 2.26   |
| 227 | Pyracarbolid              | 2.5 | 0.9987 | 0.5–50 | 2.5 | 77.4  | 15.3 | 50 | 100.7 | 0.8 | –0.32  |
| 228 | Pyraclufos                | 1   | 0.9992 | 0.5–50 | 1   | 88.5  | 10   | 50 | 101.5 | 1.1 | –3.81  |
| 229 | Pyraclonil                | 2.5 | 0.9998 | 0.5–50 | 2.5 | 116.1 | 3.8  | 50 | 99.2  | 0.7 | –10.96 |
| 230 | Pyraclostrobin            | 2.5 | 0.9967 | 0.5–50 | 2.5 | 71.5  | 17.2 | 50 | 100.2 | 1.5 | –1.74  |
| 231 | Pyraflufen-ethyl          | 10  | 0.991  | 2–50   | 10  | 108.6 | 3.1  | 50 | 96.7  | 1   | –6.23  |
| 232 | Pyraziflumid              | 5   | 0.9992 | 0.5–50 | 5   | 105   | 2.9  | 50 | 93.3  | 3.8 | –4.95  |
| 233 | Pyrazolate                | 1   | 0.9994 | 0.5–50 | 1   | 89.3  | 8.5  | 50 | 102.7 | 6.8 | –4.52  |
| 234 | Pyrazophos                | 2.5 | 0.9998 | 0.5–50 | 2.5 | 108.6 | 4.9  | 50 | 97.5  | 5.3 | 10.56  |
| 235 | Pyributicarb              | 1   | 0.9999 | 0.5–50 | 1   | 74.3  | 7    | 50 | 105.8 | 3.1 | 0.01   |
| 236 | Pyridaben                 | 1   | 0.9998 | 0.5–50 | 1   | 86    | 3.7  | 50 | 94    | 3.5 | –2.18  |
| 237 | Pyridalyl                 | 2.5 | 0.9994 | 2–50   | 2.5 | 104.3 | 4.4  | 50 | 99.6  | 2.1 | 15.72  |
| 238 | Pyrifluquinazon           | 5   | 0.9908 | 0.5–50 | 5   | 80.6  | 5.7  | 50 | 92.8  | 0.8 | 1.12   |
| 239 | Pyritfalid                | 1   | 0.9999 | 0.5–50 | 1   | 90.1  | 8.6  | 50 | 102   | 2.5 | –4.54  |
| 240 | Pyrimethanil              | 5   | 0.9981 | 2–50   | 5   | 106.5 | 7.3  | 50 | 93.3  | 0.7 | –1.69  |
| 241 | Pyrimidifen               | 2.5 | 0.9944 | 0.5–50 | 2.5 | 76.1  | 3.8  | 50 | 96.5  | 2.2 | –1.03  |
| 242 | Pyrimisulfan              | 1   | 0.9998 | 0.5–50 | 1   | 98    | 18.6 | 50 | 94.9  | 1.3 | 8.3    |
| 243 | Pyriproxyfen              | 2.5 | 0.9959 | 0.5–50 | 2.5 | 76.4  | 8.8  | 50 | 98.4  | 0.3 | –7.65  |
| 244 | Pyroquilon                | 2.5 | 0.9995 | 2–50   | 2.5 | 115   | 4.2  | 50 | 102.3 | 3.8 | –2.3   |
| 245 | Quinalphos                | 2.5 | 0.9998 | 2–50   | 2.5 | 92.8  | 4.6  | 50 | 93.7  | 2.7 | –11.3  |
| 246 | Quizalofop-ethyl          | 2.5 | 0.9994 | 0.5–50 | 2.5 | 106.6 | 2.1  | 50 | 91.9  | 1.7 | 0.07   |
| 247 | Simazine                  | 10  | 0.9996 | 2–50   | 10  | 108.6 | 7.2  | 50 | 101.5 | 7.6 | –10.92 |
| 248 | Simetryn                  | 1   | 0.9997 | 0.5–50 | 1   | 72.1  | 4.8  | 50 | 97    | 0.9 | 5.25   |
| 249 | Spinetoram (J)            | 2.5 | 0.9999 | 0.5–50 | 2.5 | 89.5  | 7.7  | 50 | 98.4  | 1.3 | –10.97 |
| 250 | Spinetoram (L)            | 1   | 0.9996 | 0.5–50 | 1   | 101.3 | 10.8 | 50 | 88.6  | 2.5 | –10    |
| 251 | Spinosyn A                | 1   | 0.9999 | 2–50   | 1   | 103.1 | 13.9 | 50 | 98.2  | 0.9 | –5     |
| 252 | Spinosyn D                | 1   | 0.9998 | 1–50   | 1   | 105.5 | 12.5 | 50 | 88.4  | 0.9 | 2.37   |
| 253 | Spirodiclofen             | 1   | 0.9999 | 0.5–50 | 1   | 95.8  | 5.7  | 50 | 91.7  | 1.1 | 12.06  |
| 254 | Spirotetramat-ketohydroxy | 5   | 0.9995 | 0.5–50 | 5   | 93.2  | 8.1  | 50 | 90.3  | 0.5 | 2.97   |
| 255 | Spirotetramat-monohydroxy | 2.5 | 0.9943 | 0.5–50 | 2.5 | 83.8  | 12.4 | 50 | 99.3  | 1.5 | 3.77   |
| 256 | Spiroxamine               | 2.5 | 0.9988 | 0.5–50 | 2.5 | 88.8  | 2.1  | 50 | 98.6  | 1.6 | –5.18  |
| 257 | Sulfentrazone             | 2.5 | 0.9944 | 0.5–50 | 2.5 | 113.6 | 16   | 50 | 96    | 3.9 | –6.23  |
| 258 | Sulfotep                  | 2.5 | 0.9962 | 0.5–50 | 2.5 | 73.9  | 13.8 | 50 | 99.6  | 0.6 | –1.67  |
| 259 | Sulfoxaflor               | 2.5 | 0.9995 | 0.5–50 | 2.5 | 92.1  | 8.3  | 50 | 99.7  | 1.2 | 17.05  |
| 260 | Sulprofos                 | 2.5 | 0.9997 | 0.5–50 | 2.5 | 111.4 | 4.8  | 50 | 97.2  | 0.7 | –0.52  |
| 261 | TCMTB                     | 5   | 0.9967 | 1–50   | 5   | 115.7 | 2.4  | 50 | 97.4  | 0.3 | 4.54   |
| 262 | Tebufenpyrad              | 1   | 0.9999 | 0.5–50 | 1   | 93.3  | 0.9  | 50 | 96.8  | 0.7 | 1.88   |
| 263 | Tebuthiuron               | 5   | 0.9975 | 0.5–50 | 5   | 117.7 | 6.1  | 50 | 105.9 | 2.2 | 3.81   |
| 264 | Tepraloxym                | 5   | 0.9971 | 0.5–50 | 5   | 105.7 | 3.2  | 50 | 94.3  | 1.5 | 18.06  |
| 265 | Terbutylazine             | 1   | 0.9988 | 1–50   | 1   | 97    | 5.8  | 50 | 99.9  | 1.8 | 3.39   |
| 266 | Terbutryn                 | 5   | 0.9949 | 0.5–50 | 5   | 101.2 | 1.4  | 50 | 99.4  | 2.5 | –3.13  |
| 267 | Tetrachlorvinphos         | 2.5 | 0.9992 | 0.5–50 | 2.5 | 84.1  | 14.9 | 50 | 95.4  | 3.8 | –0.4   |
| 268 | Tetraconazole             | 1   | 0.9999 | 2–50   | 1   | 92    | 12.9 | 50 | 95.9  | 7.4 | –4.65  |
| 269 | Thenylchlor               | 1   | 0.999  | 0.5–50 | 1   | 97.2  | 13.5 | 50 | 101.4 | 2.6 | –15.92 |
| 270 | Thiabendazole             | 2.5 | 0.9999 | 0.5–50 | 2.5 | 94    | 12.2 | 50 | 93    | 0.5 | –39.09 |
| 271 | Thiacloprid               | 2.5 | 0.9955 | 0.5–50 | 2.5 | 72.7  | 4.2  | 50 | 97.6  | 1.5 | –3.71  |

|     |                 |     |        |        |     |       |      |    |       |     |        |
|-----|-----------------|-----|--------|--------|-----|-------|------|----|-------|-----|--------|
| 272 | Thidiazuron     | 1   | 0.9997 | 0.5–50 | 1   | 109.6 | 1.2  | 50 | 90    | 1   | –2.42  |
| 273 | Thiifluzamide   | 5   | 0.9966 | 0.5–50 | 5   | 99.7  | 9.5  | 50 | 103.2 | 4.4 | –2.85  |
| 274 | Thiobencarb     | 2.5 | 0.9998 | 2–50   | 2.5 | 101.3 | 13.7 | 50 | 102.2 | 3   | –4.16  |
| 275 | Thiodicarb      | 2.5 | 0.9998 | 0.5–50 | 2.5 | 114.8 | 0.8  | 50 | 91.4  | 2.8 | 66.19  |
| 276 | Thionazin       | 2.5 | 0.9982 | 1–50   | 2.5 | 114.1 | 2    | 50 | 96.3  | 1.2 | 14.2   |
| 277 | Tiadinil        | 2.5 | 0.9994 | 0.5–50 | 2.5 | 114   | 4    | 50 | 90.4  | 3.1 | 7.72   |
| 278 | Tolfenpyrad     | 1   | 0.9999 | 0.5–50 | 1   | 105.5 | 6.3  | 50 | 91    | 1.7 | 3.72   |
| 279 | Triadimefon     | 2.5 | 0.9984 | 0.5–50 | 2.5 | 116.9 | 7.2  | 50 | 93.5  | 0.5 | –7.24  |
| 280 | Triazophos      | 1   | 0.9987 | 0.5–50 | 1   | 102.8 | 2.5  | 50 | 80    | 5   | –3.34  |
| 281 | Tricyclazole    | 2.5 | 0.9971 | 0.5–50 | 2.5 | 71.9  | 3.6  | 50 | 98.5  | 2.5 | –9.68  |
| 282 | Trifloxystrobin | 2.5 | 0.9995 | 0.5–50 | 2.5 | 94.2  | 5.5  | 50 | 102.2 | 2.6 | 17.4   |
| 283 | Triflumizole    | 1   | 0.9998 | 0.5–50 | 1   | 113   | 2.5  | 50 | 94.6  | 1.7 | –5.73  |
| 284 | Triflumuron     | 2.5 | 0.9996 | 0.5–50 | 2.5 | 92.6  | 4    | 50 | 94.1  | 1.4 | –7.37  |
| 285 | Triticonazole   | 2.5 | 0.9989 | 0.5–50 | 2.5 | 115.6 | 13.1 | 50 | 94    | 3.1 | –14.09 |
| 286 | Vamidothion     | 1   | 0.9992 | 0.5–50 | 1   | 95    | 10.9 | 50 | 99.3  | 2   | –24.23 |
| 287 | Zoxamide        | 1   | 0.9992 | 0.5–50 | 1   | 101   | 5.7  | 50 | 89    | 2.6 | 8.95   |

**Table S2.** Method validation data for pesticide residue analysis in grapefruit

| No. | Compound name      | LOQ<br>(µg/kg) | $R^2$  | Linear<br>range<br>(µg/kg) | Low                      |               |          | High                     |               |          | Matrix<br>effect<br>% |
|-----|--------------------|----------------|--------|----------------------------|--------------------------|---------------|----------|--------------------------|---------------|----------|-----------------------|
|     |                    |                |        |                            | Fortification<br>(µg/kg) | Recovery<br>% | RSD<br>% | Fortification<br>(µg/kg) | Recovery<br>% | RSD<br>% |                       |
| 1   | 2,3,5-trimethacarb | 1              | 0.9998 | 0.5–50                     | 1                        | 81            | 3.6      | 50                       | 102.8         | 8.3      | –4.57                 |
| 2   | 3,4,5-trimethacarb | 1              | 0.9975 | 0.5–50                     | 1                        | 72            | 10.4     | 50                       | 92.3          | 1.4      | 2.23                  |
| 3   | Abamectin          | 2.5            | 0.9916 | 1–50                       | 2.5                      | 113.3         | 5.1      | 50                       | 98.3          | 11.4     | –99.97                |
| 4   | Acetamiprid        | 2.5            | 0.9993 | 0.5–50                     | 2.5                      | 112.1         | 1.7      | 50                       | 87.9          | 0.8      | –43.09                |
| 5   | Alachlor           | 2.5            | 0.9994 | 0.5–50                     | 2.5                      | 88.9          | 6.7      | 50                       | 93            | 5.7      | –6.61                 |
| 6   | Aldicarb sulfoxide | 2.5            | 0.9996 | 0.5–50                     | 2.5                      | 99.9          | 12.2     | 50                       | 94.6          | 6.3      | –51.04                |
| 7   | Alidcarb sulfone   | 5              | 0.9998 | 0.5–50                     | 5                        | 113.2         | 13.1     | 50                       | 95.7          | 4.5      | –32.56                |
| 8   | Ametoctradin       | 2.5            | 0.9972 | 0.5–50                     | 2.5                      | 76.4          | 4.6      | 50                       | 91.5          | 5.6      | –9.01                 |
| 9   | Ametryn            | 1              | 0.9997 | 0.5–50                     | 1                        | 93.3          | 14.9     | 50                       | 91.4          | 3        | 0.51                  |
| 10  | Anilofos           | 2.5            | 0.9967 | 0.5–50                     | 2.5                      | 71.6          | 4.9      | 50                       | 105.8         | 3.8      | –0.89                 |
| 11  | Aramite            | 1              | 0.9987 | 0.5–50                     | 1                        | 77.7          | 14.3     | 50                       | 98.2          | 5.1      | –2.06                 |
| 12  | Aspon              | 2.5            | 0.999  | 0.5–50                     | 2.5                      | 109.4         | 4.8      | 50                       | 99.2          | 8.1      | –5.73                 |
| 13  | Atrazine           | 1              | 0.9999 | 0.5–50                     | 1                        | 91.7          | 4.7      | 50                       | 97            | 3.6      | 2.23                  |
| 14  | Azaconazole        | 1              | 0.9992 | 0.5–50                     | 1                        | 100.3         | 13       | 50                       | 98            | 1.4      | 2.47                  |
| 15  | Azamethiophos      | 2.5            | 0.9996 | 0.5–50                     | 2.5                      | 119.6         | 1.1      | 50                       | 94.1          | 3.3      | –28.64                |
| 16  | Azimsulfuron       | 1              | 0.9993 | 0.5–50                     | 1                        | 78.2          | 7        | 50                       | 81.3          | 9.3      | 10.08                 |
| 17  | Azoxystrobin       | 2.5            | 0.9978 | 0.5–50                     | 2.5                      | 79            | 2        | 50                       | 97.8          | 7.3      | –8.71                 |
| 18  | Benalaxyl          | 2.5            | 0.9988 | 0.5–50                     | 2.5                      | 77.1          | 8.2      | 50                       | 92.3          | 3.4      | –4.87                 |
| 19  | Bendiocarb         | 2.5            | 0.9985 | 0.5–50                     | 2.5                      | 110.7         | 9.2      | 50                       | 88.7          | 2        | –8.45                 |

|    |                             |     |        |        |     |       |      |    |       |      |        |
|----|-----------------------------|-----|--------|--------|-----|-------|------|----|-------|------|--------|
| 20 | Benoxacor                   | 2.5 | 0.9998 | 0.5–50 | 2.5 | 85.3  | 2.9  | 50 | 98.3  | 1.6  | 0.2    |
| 21 | Bensulfuron-methyl          | 1   | 0.9997 | 0.5–50 | 1   | 78.1  | 11.5 | 50 | 93.2  | 8.5  | 14.03  |
| 22 | Bensulide                   | 2.5 | 0.9983 | 0.5–50 | 2.5 | 82.9  | 15.3 | 50 | 77.7  | 6.1  | 34.63  |
| 23 | Benthiavalicarb-isopropyl   | 2.5 | 0.9994 | 0.5–50 | 2.5 | 88.5  | 5.3  | 50 | 97.7  | 1.7  | –6.07  |
| 24 | Benzobicyclon               | 2.5 | 0.996  | 0.5–50 | 2.5 | 72.1  | 0.4  | 50 | 95.3  | 3.4  | 10.91  |
| 25 | Benzoylprop-ethyl           | 2.5 | 0.999  | 0.5–50 | 2.5 | 83.8  | 0    | 50 | 97.2  | 5.5  | –5.31  |
| 26 | Bitertanol                  | 2.5 | 0.9945 | 0.5–50 | 2.5 | 107.3 | 0.2  | 50 | 89.7  | 5.7  | 11.13  |
| 27 | Bixafen                     | 2.5 | 0.9986 | 0.5–50 | 2.5 | 76.3  | 18.7 | 50 | 100.7 | 10.4 | 1.12   |
| 28 | Boscalid                    | 2.5 | 0.9996 | 0.5–50 | 2.5 | 97.3  | 13.2 | 50 | 98.4  | 1    | –2.29  |
| 29 | Broflanilide                | 5   | 0.9988 | 0.5–50 | 5   | 91.9  | 14.3 | 50 | 96.1  | 5.1  | –11.12 |
| 30 | Broflanilide DM-8007        | 2.5 | 0.9997 | 0.5–50 | 2.5 | 70.3  | 7.3  | 50 | 94.7  | 9    | 12.98  |
| 31 | Broflanilide S(PFP-OH)-8007 | 5   | 0.9947 | 0.5–50 | 5   | 99    | 14   | 50 | 110.5 | 2.2  | –45.72 |
| 32 | Bromacil                    | 5   | 0.9998 | 0.5–50 | 5   | 88.7  | 11.6 | 50 | 95.5  | 0    | –27.44 |
| 33 | Bromobutide                 | 2.5 | 0.9988 | 0.5–50 | 2.5 | 106.5 | 6.2  | 50 | 89.2  | 5.7  | 0.21   |
| 34 | Bupirimate                  | 2.5 | 0.9985 | 0.5–50 | 2.5 | 87.7  | 14.9 | 50 | 93.7  | 0.5  | –2.26  |
| 35 | Buprofezin                  | 1   | 0.9994 | 0.5–50 | 1   | 108   | 4.3  | 50 | 87    | 3.8  | –5.74  |
| 36 | Cadusafos                   | 5   | 0.9978 | 0.5–50 | 5   | 90.6  | 6.6  | 50 | 97.3  | 1.7  | 3.84   |
| 37 | Carbaryl                    | 2.5 | 0.9993 | 0.5–50 | 2.5 | 94.8  | 8.9  | 50 | 109.6 | 13.5 | 2.25   |
| 38 | Carbetamide                 | 2.5 | 0.9998 | 0.5–50 | 2.5 | 101   | 5.1  | 50 | 100.2 | 5.8  | –21.53 |
| 39 | Carbofuran                  | 1   | 0.9996 | 0.5–50 | 1   | 75.4  | 1.6  | 50 | 102.9 | 0.1  | –39.5  |
| 40 | Carboxin                    | 5   | 0.9989 | 0.5–50 | 5   | 97.6  | 0.8  | 50 | 100.3 | 1.5  | 0.47   |
| 41 | Carfentrazone-ethyl         | 2.5 | 0.9987 | 0.5–50 | 2.5 | 103.4 | 0.1  | 50 | 93.3  | 1.3  | –6.44  |
| 42 | Carpropamid                 | 2.5 | 0.9998 | 0.5–50 | 2.5 | 111.9 | 7.8  | 50 | 88.9  | 4.7  | –5.48  |
| 43 | Chlorantraniliprole         | 5   | 0.9989 | 0.5–50 | 5   | 109.8 | 12.7 | 50 | 97.8  | 1.3  | 3.78   |
| 44 | Chlorbenzuron               | 5   | 0.9971 | 0.5–50 | 5   | 80.7  | 0.1  | 50 | 96.8  | 6.2  | –6.29  |
| 45 | Chlorfenvinphos             | 2.5 | 0.9993 | 0.5–50 | 2.5 | 93.1  | 7.6  | 50 | 100.2 | 5.3  | –8.35  |
| 46 | Chlorimuron-ethyl           | 5   | 0.9996 | 0.5–50 | 5   | 88.7  | 8.9  | 50 | 83.7  | 9.9  | 10.05  |
| 47 | Chlorotoluron               | 1   | 0.9995 | 0.5–50 | 1   | 117.6 | 13.9 | 50 | 86.4  | 9.7  | –16.48 |
| 48 | Chloroxuron                 | 2.5 | 0.999  | 0.5–50 | 2.5 | 85.6  | 8.6  | 50 | 98.1  | 4.4  | 0.62   |
| 49 | Chlorpyrifos                | 2.5 | 0.9998 | 0.5–50 | 2.5 | 87.8  | 4.2  | 50 | 93.6  | 3    | –12.52 |
| 50 | Chlorpyrifos-methyl         | 5   | 0.9988 | 0.5–50 | 5   | 101.4 | 6.9  | 50 | 101   | 0.1  | –1.83  |
| 51 | Chromafenozide              | 5   | 0.9996 | 0.5–50 | 5   | 93.2  | 15.6 | 50 | 74.6  | 11   | –32.99 |
| 52 | Clethodim                   | 10  | 0.9992 | 0.5–50 | 10  | 86.9  | 0.1  | 50 | 94.8  | 0.1  | –17.4  |
| 53 | Clofentezine                | 2.5 | 0.999  | 0.5–50 | 2.5 | 79.9  | 3.1  | 50 | 88.4  | 1.8  | –7     |
| 54 | Clomazone                   | 2.5 | 0.9991 | 0.5–50 | 2.5 | 87.1  | 11.4 | 50 | 98.9  | 2.3  | –2.68  |
| 55 | Clothianidin                | 2.5 | 0.9996 | 0.5–50 | 2.5 | 78.1  | 7.4  | 50 | 90.8  | 10.2 | –18.09 |
| 56 | Coumaphos                   | 2.5 | 0.9987 | 0.5–50 | 2.5 | 82.1  | 5    | 50 | 95    | 4.4  | –2.05  |
| 57 | Crufomate                   | 5   | 0.991  | 0.5–50 | 5   | 108   | 11.8 | 50 | 106   | 1.5  | –1.52  |
| 58 | Cyanazine                   | 1   | 0.9999 | 0.5–50 | 1   | 107.7 | 7.8  | 50 | 94.9  | 0.2  | –2.92  |
| 59 | Cyazofamid                  | 5   | 0.9913 | 0.5–50 | 5   | 118   | 14.1 | 50 | 119   | 2.6  | –3.08  |
| 60 | Cyclosulfamuron             | 1   | 0.9979 | 0.5–50 | 1   | 99.8  | 11   | 50 | 93.1  | 6.6  | 3.61   |
| 61 | Cyflufenamid                | 5   | 0.9957 | 0.5–50 | 5   | 88.2  | 7.7  | 50 | 96.6  | 6.3  | –7.49  |
| 62 | Cyprazine                   | 2.5 | 0.9988 | 0.5–50 | 2.5 | 86.4  | 10.1 | 50 | 99.1  | 6.9  | –0.92  |
| 63 | Cyprodinil                  | 2.5 | 0.9996 | 0.5–50 | 2.5 | 86.5  | 0.5  | 50 | 97    | 3    | –5.86  |
| 64 | Daimuron                    | 1   | 0.9995 | 0.5–50 | 1   | 112.4 | 4    | 50 | 103.8 | 5.5  | –2.06  |
| 65 | Demeton-O                   | 2.5 | 0.9952 | 0.5–50 | 2.5 | 88.8  | 3.4  | 50 | 103.6 | 0    | 16.16  |
| 66 | Demeton-S                   | 5   | 0.9985 | 0.5–50 | 5   | 103.1 | 15   | 50 | 93.6  | 7.1  | 7.66   |



|     |                          |     |        |        |     |       |      |    |       |      |        |
|-----|--------------------------|-----|--------|--------|-----|-------|------|----|-------|------|--------|
| 67  | Demeton-S-methyl-sulfone | 1   | 0.9992 | 0.5–50 | 1   | 98.8  | 4.2  | 50 | 93.3  | 1.4  | –19.21 |
| 68  | Desmetryn                | 1   | 0.9998 | 0.5–50 | 1   | 78    | 14.3 | 50 | 99.1  | 2.1  | –7.07  |
| 69  | Diazinon                 | 1   | 0.9997 | 0.5–50 | 1   | 94.1  | 5.9  | 50 | 93.5  | 4.8  | –4.1   |
| 70  | Dichlorvos               | 10  | 0.9979 | 0.5–50 | 10  | 112.2 | 1.2  | 50 | 117.9 | 1.2  | –7.64  |
| 71  | Diclobutrazol            | 2.5 | 0.9983 | 0.5–50 | 2.5 | 117   | 10.3 | 50 | 105.6 | 8    | –15.61 |
| 72  | Dicrotophos              | 2.5 | 0.9994 | 0.5–50 | 2.5 | 110.8 | 1.3  | 50 | 92.6  | 2.5  | 4      |
| 73  | Diethatyl-ethyl          | 1   | 0.9998 | 0.5–50 | 1   | 97    | 14.4 | 50 | 103.4 | 3.6  | –15.05 |
| 74  | Diethofencarb            | 2.5 | 0.9981 | 0.5–50 | 2.5 | 84.2  | 10   | 50 | 97.4  | 1.2  | 1.2    |
| 75  | Difenoconazole           | 1   | 0.9999 | 0.5–50 | 1   | 87.9  | 13.2 | 50 | 97.5  | 1.7  | 5.11   |
| 76  | Diflubenzuron            | 2.5 | 0.9983 | 0.5–50 | 2.5 | 95.4  | 5    | 50 | 91.4  | 3.9  | –12.47 |
| 77  | Diflufenican             | 1   | 0.9989 | 0.5–50 | 1   | 70.7  | 19.2 | 50 | 95.1  | 5.7  | –4.56  |
| 78  | Dimethachlor             | 1   | 0.9997 | 0.5–50 | 1   | 82.2  | 6.1  | 50 | 95.9  | 0.1  | 4.24   |
| 79  | Dimethametryn            | 5   | 0.9919 | 0.5–50 | 5   | 93.4  | 16   | 50 | 103.4 | 7.9  | –4.38  |
| 80  | Dimethenamide            | 2.5 | 0.9986 | 0.5–50 | 2.5 | 82.5  | 6.3  | 50 | 96.3  | 3.1  | –2.7   |
| 81  | Dimethoate               | 1   | 0.9999 | 0.5–50 | 1   | 90.9  | 1.5  | 50 | 96.6  | 2.5  | –40.98 |
| 82  | Diniconazole             | 2.5 | 0.9978 | 0.5–50 | 2.5 | 73.9  | 9.7  | 50 | 92.7  | 6.5  | 3.06   |
| 83  | Dinotefuran              | 2.5 | 0.9979 | 1–50   | 2.5 | 103   | 13.6 | 50 | 98.3  | 5.1  | –53.6  |
| 84  | Diphenamid               | 1   | 0.9938 | 0.5–50 | 1   | 107.2 | 1.8  | 50 | 99.5  | 3.5  | 5.11   |
| 85  | Dithiopyr                | 2.5 | 0.9982 | 0.5–50 | 2.5 | 83    | 7.9  | 50 | 95.2  | 10.2 | 8.61   |
| 86  | Diuron                   | 1   | 0.9997 | 0.5–50 | 1   | 85.4  | 18.1 | 50 | 94.6  | 1.5  | –5.86  |
| 87  | Edifenphos               | 5   | 0.9977 | 1–50   | 5   | 92.1  | 1.1  | 50 | 91.3  | 2.7  | –4.5   |
| 88  | Epoxiconazole            | 1   | 0.9982 | 0.5–50 | 1   | 87.8  | 13.4 | 50 | 94.4  | 5.3  | –7.26  |
| 89  | Esprocarb                | 2.5 | 0.997  | 0.5–50 | 2.5 | 73.5  | 0.8  | 50 | 96.2  | 3.9  | –3.51  |
| 90  | Etaconazole              | 5   | 0.9988 | 1–50   | 5   | 102   | 3.4  | 50 | 96    | 5.8  | –13.67 |
| 91  | Ethaboxam                | 1   | 0.9996 | 0.5–50 | 1   | 90.4  | 7    | 50 | 97    | 5.2  | –8.27  |
| 92  | Ethiofencarb             | 1   | 0.9998 | 0.5–50 | 1   | 81.2  | 0.9  | 50 | 97    | 1.3  | 5.69   |
| 93  | Ethirimol                | 2.5 | 0.9997 | 0.5–50 | 2.5 | 107   | 6.5  | 50 | 91    | 0.5  | –9.35  |
| 94  | Ethoprophos              | 1   | 0.9986 | 1–50   | 1   | 106.9 | 8.2  | 50 | 91.8  | 5.4  | –9     |
| 95  | Etofenprox               | 1   | 0.9957 | 0.5–50 | 1   | 107.4 | 14.3 | 50 | 98.4  | 5    | –0.84  |
| 96  | Etoxazole                | 5   | 0.9916 | 0.5–50 | 5   | 94    | 5.9  | 50 | 98    | 5.3  | –12.18 |
| 97  | Etrinfos                 | 2.5 | 0.9993 | 1–50   | 2.5 | 91.1  | 1.9  | 50 | 98.3  | 1.8  | –7.33  |
| 98  | Famoxadone               | 10  | 0.9983 | 0.5–50 | 10  | 103   | 10.7 | 50 | 91.2  | 10.7 | –13.05 |
| 99  | Fenamiphos               | 2.5 | 0.9974 | 0.5–50 | 2.5 | 72    | 15.7 | 50 | 104.3 | 1.8  | –0.26  |
| 100 | Fenamiphos sulfone       | 2.5 | 0.9993 | 0.5–50 | 2.5 | 112.2 | 4.6  | 50 | 99.1  | 1.8  | 9.81   |
| 101 | Fenamiphos sulfoxide     | 2.5 | 0.9981 | 0.5–50 | 2.5 | 112.5 | 2.1  | 50 | 93.3  | 0.5  | 4.81   |
| 102 | Fenarimol                | 1   | 0.9982 | 1–50   | 1   | 91.2  | 16.6 | 50 | 98.6  | 1.6  | 1.5    |
| 103 | Fenbuconazole            | 2.5 | 0.9983 | 0.5–50 | 2.5 | 72.9  | 7.9  | 50 | 99.3  | 4.2  | 1.24   |
| 104 | Fenfuram                 | 2.5 | 0.9983 | 0.5–50 | 2.5 | 78.7  | 4.6  | 50 | 100.8 | 1.1  | –1.88  |
| 105 | Fenobucarb               | 1   | 0.9979 | 0.5–50 | 1   | 95.7  | 3    | 50 | 88.3  | 6.4  | 24.28  |
| 106 | Fenothiocarb             | 2.5 | 0.9993 | 0.5–50 | 2.5 | 106.5 | 8    | 50 | 98.6  | 0.9  | –28.49 |
| 107 | Fenoxanil                | 2.5 | 0.9983 | 0.5–50 | 2.5 | 82.6  | 8    | 50 | 106.3 | 0.7  | –7.56  |
| 108 | Fenoxycarb               | 2.5 | 0.9999 | 0.5–50 | 2.5 | 88.7  | 8.5  | 50 | 94.7  | 6.3  | 0.53   |
| 109 | Fenpropimorph            | 1   | 0.9999 | 0.5–50 | 1   | 92.3  | 2.7  | 50 | 98    | 2.9  | –24.4  |
| 110 | Fenpyroximate            | 1   | 0.9994 | 0.5–50 | 1   | 91.6  | 2.5  | 50 | 99.1  | 3.1  | –11.07 |
| 111 | Fenthion                 | 2.5 | 0.9993 | 0.5–50 | 2.5 | 98    | 6.4  | 50 | 94.9  | 7.4  | –7.62  |
| 112 | Fenthion oxon            | 1   | 0.999  | 0.5–50 | 1   | 88.4  | 5.2  | 50 | 101.5 | 0.7  | –9.63  |
| 113 | Fenthion oxon sulfone    | 2.5 | 0.9992 | 0.5–50 | 2.5 | 81.8  | 1.6  | 50 | 90.6  | 0.2  | –34.61 |

|     |                         |     |        |        |     |       |      |    |       |      |        |
|-----|-------------------------|-----|--------|--------|-----|-------|------|----|-------|------|--------|
| 114 | Fenthion oxon sulfoxide | 1   | 0.9999 | 1–50   | 1   | 109.5 | 10.9 | 50 | 91.9  | 4.8  | –31.27 |
| 115 | Fenthion sulfoxide      | 1   | 0.9991 | 0.5–50 | 1   | 85.7  | 8.4  | 50 | 96.2  | 2.9  | –11.07 |
| 116 | Fenthion-sulfone        | 2.5 | 0.9992 | 1–50   | 2.5 | 90.2  | 10.9 | 50 | 97.7  | 1.6  | 3.61   |
| 117 | Ferimzone               | 1   | 0.9996 | 0.5–50 | 1   | 78.3  | 3.8  | 50 | 95.2  | 5.6  | –2.07  |
| 118 | Fipronil                | 2.5 | 0.9986 | 0.5–50 | 2.5 | 113.4 | 5.4  | 50 | 82.9  | 1.9  | –0.62  |
| 119 | Fipronil-sulfone        | 2.5 | 0.9986 | 0.5–50 | 2.5 | 86.1  | 12.1 | 50 | 95.7  | 0    | –5.15  |
| 120 | Flamprop-isopropyl      | 2.5 | 0.9992 | 0.5–50 | 2.5 | 106   | 2.7  | 50 | 93.4  | 4.7  | –5.22  |
| 121 | Flonicamid              | 1   | 0.9996 | 0.5–50 | 1   | 82.7  | 16.3 | 50 | 104.1 | 9.9  | –3.71  |
| 122 | Fluazinam               | 1   | 0.9998 | 0.5–50 | 1   | 106.8 | 1    | 50 | 92.8  | 0.2  | –8.14  |
| 123 | Flucetosulfuron         | 5   | 0.9995 | 0.5–50 | 5   | 79    | 0.4  | 50 | 77.6  | 6.5  | 18.58  |
| 124 | Fludioxonil             | 2.5 | 0.9997 | 0.5–50 | 2.5 | 105   | 0.1  | 50 | 95.1  | 0.1  | –18.86 |
| 125 | Flufenacet              | 5   | 0.9963 | 1–50   | 5   | 89.8  | 8.6  | 50 | 84.1  | 10.1 | –4.16  |
| 126 | Flufenoxuron            | 1   | 0.9999 | 0.5–50 | 1   | 106.2 | 5.9  | 50 | 96.4  | 3.1  | –0.43  |
| 127 | Fluometuron             | 2.5 | 0.9995 | 2–50   | 2.5 | 73.5  | 2.7  | 50 | 89.6  | 3.8  | –1.1   |
| 128 | Fluopicolide            | 1   | 0.9999 | 0.5–50 | 1   | 100.8 | 2.3  | 50 | 102.1 | 0.5  | 9.99   |
| 129 | Flupyrarn               | 5   | 0.9954 | 0.5–50 | 5   | 90.4  | 3.5  | 50 | 98.7  | 2.3  | 1.2    |
| 130 | Flupyradifuron          | 1   | 0.9995 | 0.5–50 | 1   | 75.2  | 11.4 | 50 | 87.9  | 5.5  | –33.37 |
| 131 | Fluquinconazole         | 2.5 | 0.9962 | 0.5–50 | 2.5 | 100.6 | 18.5 | 50 | 94.1  | 10.2 | –7.53  |
| 132 | Fluridone               | 1   | 0.9999 | 0.5–50 | 1   | 107.4 | 1.1  | 50 | 94.4  | 0.3  | –18.87 |
| 133 | Flurochloridone         | 2.5 | 0.9982 | 0.5–50 | 2.5 | 73.7  | 0.4  | 50 | 98.1  | 4.1  | –6.63  |
| 134 | Flurtamone              | 5   | 0.9924 | 0.5–50 | 5   | 78.6  | 17.5 | 50 | 95.7  | 2.5  | 0.11   |
| 135 | Flusilazole             | 2.5 | 0.9988 | 0.5–50 | 2.5 | 79.5  | 3.6  | 50 | 88.7  | 3.5  | –9.37  |
| 136 | Fluthiacet-methyl       | 2.5 | 0.9997 | 0.5–50 | 2.5 | 87.6  | 3.3  | 50 | 101   | 1.9  | –1.35  |
| 137 | Flutianil               | 2.5 | 0.9998 | 0.5–50 | 2.5 | 96.9  | 3.1  | 50 | 99.9  | 4.3  | –12.77 |
| 138 | Flutolanil              | 1   | 0.9951 | 0.5–50 | 1   | 77.5  | 0.5  | 50 | 90.8  | 3.4  | 7.98   |
| 139 | Flutriafol              | 1   | 1      | 0.5–50 | 1   | 77.6  | 3.5  | 50 | 89.7  | 1.9  | –1.57  |
| 140 | Fluxapyroxad            | 2.5 | 0.9988 | 0.5–50 | 2.5 | 85.8  | 8.8  | 50 | 102.7 | 3.5  | 9.12   |
| 141 | Fosthiazate             | 1   | 0.9998 | 0.5–50 | 1   | 107.1 | 1.6  | 50 | 95.9  | 2.5  | –9.45  |
| 142 | Furathiocarb            | 1   | 0.9997 | 0.5–50 | 1   | 114.6 | 4    | 50 | 93.2  | 3.9  | –1.07  |
| 143 | Heptenophos             | 2.5 | 0.9984 | 0.5–50 | 2.5 | 107.9 | 3    | 50 | 106.4 | 12.9 | 14.45  |
| 144 | Hexaflumuron            | 2.5 | 0.9981 | 0.5–50 | 2.5 | 72.4  | 16.7 | 50 | 93.9  | 2.1  | –3.4   |
| 145 | Hexazinone              | 2.5 | 0.997  | 1–50   | 2.5 | 82.4  | 6    | 50 | 98.6  | 0.6  | –1.55  |
| 146 | Hexythiazox             | 2.5 | 0.9982 | 0.5–50 | 2.5 | 85.6  | 4    | 50 | 93.8  | 5.8  | –12.66 |
| 147 | Imibenconazole          | 1   | 0.9999 | 0.5–50 | 1   | 98.5  | 17.3 | 50 | 89.5  | 8.1  | 1.38   |
| 148 | Imicyafos               | 2.5 | 0.9951 | 0.5–50 | 2.5 | 113.2 | 3.3  | 50 | 89.3  | 2.7  | –33.84 |
| 149 | Imidacloprid            | 1   | 0.9993 | 0.5–50 | 1   | 97.6  | 3.9  | 50 | 90    | 3    | 0.48   |
| 150 | Inabenfide              | 1   | 0.9997 | 0.5–50 | 1   | 94.5  | 0.8  | 50 | 95.7  | 2    | –6.45  |
| 151 | Indanofan               | 2.5 | 0.9991 | 0.5–50 | 2.5 | 115.8 | 8.6  | 50 | 90.3  | 2.5  | 10.05  |
| 152 | Ipconazole              | 5   | 0.9943 | 0.5–50 | 5   | 90.4  | 16.9 | 50 | 94.9  | 8.7  | 2.52   |
| 153 | Iprobenfos              | 2.5 | 0.9954 | 0.5–50 | 2.5 | 73.5  | 9    | 50 | 104.2 | 1.1  | –27.73 |
| 154 | Iprovalicarb            | 1   | 0.9994 | 0.5–50 | 1   | 97.8  | 16.5 | 50 | 96.1  | 10.3 | –12.17 |
| 155 | Isoprocab               | 1   | 0.9981 | 0.5–50 | 1   | 111.8 | 12.2 | 50 | 98.2  | 3.9  | 10.47  |
| 156 | Isoprothiolane          | 1   | 0.9996 | 0.5–50 | 1   | 86.5  | 7.6  | 50 | 97.6  | 3.8  | –7.17  |
| 157 | Isopyrazam              | 2.5 | 0.9991 | 1–50   | 2.5 | 84.1  | 2.8  | 50 | 91.1  | 6.4  | –0.18  |
| 158 | Isoxaben                | 5   | 0.9959 | 0.5–50 | 5   | 99.1  | 4.2  | 50 | 108.5 | 1.3  | –7.73  |
| 159 | Lenacil                 | 2.5 | 0.9999 | 0.5–50 | 2.5 | 110.5 | 5.5  | 50 | 90.7  | 0.3  | 15.09  |
| 160 | Linuron                 | 5   | 0.9976 | 0.5–50 | 5   | 89.9  | 7.7  | 50 | 97.7  | 1.6  | –1.56  |

|     |                      |     |        |        |     |       |      |    |       |      |        |
|-----|----------------------|-----|--------|--------|-----|-------|------|----|-------|------|--------|
| 161 | Lufenuron            | 2.5 | 0.9999 | 0.5–50 | 2.5 | 94.4  | 0.2  | 50 | 80.2  | 17.2 | 1.54   |
| 162 | Malaoxon             | 1   | 0.9998 | 0.5–50 | 1   | 116.3 | 11.9 | 50 | 98.5  | 3.1  | –15.13 |
| 163 | Mandipropamid        | 2.5 | 0.9996 | 0.5–50 | 2.5 | 91.9  | 17.9 | 50 | 94.8  | 2.1  | –0.49  |
| 164 | Mecarbam             | 2.5 | 0.9979 | 1–50   | 2.5 | 81.3  | 11.7 | 50 | 100.8 | 10.1 | 2.6    |
| 165 | Mefenacet            | 2.5 | 0.9974 | 0.5–50 | 2.5 | 94.1  | 1.4  | 50 | 95.5  | 2.1  | –9.13  |
| 166 | Mepanipyrim          | 2.5 | 0.9983 | 0.5–50 | 2.5 | 88.6  | 0.3  | 50 | 92    | 13.5 | 0.98   |
| 167 | Mephosfolan          | 1   | 0.9993 | 0.5–50 | 1   | 79    | 8.4  | 50 | 97.1  | 1.4  | –28.93 |
| 168 | Mepronil             | 5   | 0.9958 | 0.5–50 | 5   | 97    | 2.2  | 50 | 93.5  | 3.7  | –5.42  |
| 169 | Metaflumizone (1)    | 1   | 0.9959 | 1–50   | 1   | 82.6  | 11.2 | 50 | 96.1  | 10.4 | –8.6   |
|     | Metaflumizone (2)    | 5   | 0.996  | 0.5–50 | 5   | 93    | 7.6  | 50 | 90.4  | 11   | –8.6   |
| 170 | Metalaxyl            | 2.5 | 0.9996 | 0.5–50 | 2.5 | 103.2 | 1.4  | 50 | 80.2  | 6.2  | 0.4    |
| 171 | Metamifop            | 2.5 | 0.9975 | 0.5–50 | 2.5 | 72.1  | 0    | 50 | 101.2 | 12.2 | –3.48  |
| 172 | Metconazole          | 5   | 0.9992 | 0.5–50 | 5   | 89.4  | 5.1  | 50 | 96.1  | 1.6  | 1.53   |
| 173 | Methabenzthiazuron   | 1   | 0.9999 | 0.5–50 | 1   | 109.5 | 5.2  | 50 | 95.9  | 1.6  | –39.75 |
| 174 | Methiocarb-sulfone   | 1   | 0.9998 | 0.5–50 | 1   | 104.6 | 9.5  | 50 | 92.7  | 1    | –47.29 |
| 175 | Methiocarb-sulfoxide | 1   | 0.9994 | 0.5–50 | 1   | 85.7  | 4.9  | 50 | 96    | 0.5  | –8.11  |
| 176 | Methomyl             | 1   | 0.9993 | 0.5–50 | 1   | 87    | 15.6 | 50 | 98.4  | 0.4  | –34.39 |
| 177 | Methoprotryne        | 2.5 | 0.9995 | 0.5–50 | 2.5 | 96.6  | 2.7  | 50 | 100.6 | 2.7  | –7.75  |
| 178 | Metobromuron         | 1   | 0.9996 | 0.5–50 | 1   | 86.4  | 9.8  | 50 | 98.9  | 1.1  | –0.23  |
| 179 | Metominostrobin (Z)  | 1   | 0.9998 | 0.5–50 | 1   | 114.5 | 0.5  | 50 | 94.9  | 1.3  | –6.49  |
| 180 | Metominostrobin (E)  | 2.5 | 0.9961 | 0.5–50 | 2.5 | 72.8  | 2.2  | 50 | 97.4  | 2    | –5.29  |
| 181 | Metrafenon           | 2.5 | 0.9988 | 0.5–50 | 2.5 | 94.9  | 0.5  | 50 | 100.1 | 4.4  | 1.86   |
| 182 | Mevinphos (1)        | 1   | 0.9973 | 0.5–50 | 1   | 88.7  | 6.3  | 50 | 97.7  | 1.2  | 0.44   |
|     | Mevinphos (2)        | 5   | 0.9984 | 0.5–50 | 5   | 94    | 3    | 50 | 102.5 | 1.5  | –17.41 |
| 183 | Monocrotophos        | 1   | 0.9997 | 0.5–50 | 1   | 81.4  | 3.8  | 50 | 95.9  | 6.2  | –12.92 |
| 184 | Myclobutanil         | 2.5 | 0.9984 | 1–50   | 2.5 | 93.7  | 18.3 | 50 | 95.8  | 11   | –7.12  |
| 185 | Napropamide          | 5   | 0.9955 | 0.5–50 | 5   | 100.2 | 10.9 | 50 | 104.4 | 7.7  | –2.55  |
| 186 | Neburon              | 10  | 0.9933 | 1–50   | 10  | 85.3  | 5.3  | 50 | 100.9 | 5.3  | –24.55 |
| 187 | Novaluron            | 5   | 0.9944 | 0.5–50 | 5   | 85    | 2.7  | 50 | 91.9  | 0.4  | –9.42  |
| 188 | Nuarimol             | 1   | 0.9999 | 0.5–50 | 1   | 100.9 | 0.2  | 50 | 100.4 | 0.9  | –2.86  |
| 189 | Ofurace              | 1   | 0.9999 | 0.5–50 | 1   | 94.8  | 5.4  | 50 | 90.5  | 3.5  | –19.4  |
| 190 | Omethoate            | 1   | 0.9993 | 0.5–50 | 1   | 100   | 9    | 50 | 91.2  | 8.2  | –46.54 |
| 191 | Oxadiazon            | 2.5 | 0.9988 | 0.5–50 | 2.5 | 119   | 2.6  | 50 | 96.7  | 0.6  | –16.52 |
| 192 | Oxamyl               | 2.5 | 0.9996 | 0.5–50 | 2.5 | 110.6 | 10.7 | 50 | 98.4  | 3.7  | –38.7  |
| 193 | Oxaziclomefone       | 5   | 0.9978 | 0.5–50 | 5   | 93.6  | 11.4 | 50 | 96.9  | 11.6 | –0.82  |
| 194 | Penconazole          | 2.5 | 0.9937 | 0.5–50 | 2.5 | 83    | 3.2  | 50 | 94.3  | 9.9  | –3.04  |
| 195 | Pencycuron           | 5   | 0.9915 | 0.5–50 | 5   | 92.3  | 1.1  | 50 | 104   | 1.6  | –2.74  |
| 196 | Phenthoate           | 1   | 0.9995 | 0.5–50 | 1   | 91.7  | 16.8 | 50 | 95.7  | 0.3  | –33.72 |
| 197 | Phosalone            | 2.5 | 0.9993 | 1–50   | 2.5 | 86.1  | 7.5  | 50 | 88.7  | 11.9 | –6.44  |
| 198 | Phosfolan            | 5   | 0.9983 | 0.5–50 | 5   | 104   | 2.5  | 50 | 96    | 0.4  | –6.95  |
| 199 | Phosmet-oxon         | 2.5 | 0.9984 | 0.5–50 | 2.5 | 77.9  | 2.1  | 50 | 100.9 | 0.2  | –3.91  |
| 200 | Phosphamidon         | 1   | 0.9998 | 0.5–50 | 1   | 115.2 | 5.1  | 50 | 98.3  | 0.7  | 1.45   |
| 201 | Phoxim               | 2.5 | 0.9999 | 0.5–50 | 2.5 | 86.5  | 4.6  | 50 | 85.6  | 6.8  | –15.19 |
| 202 | Picolinafen          | 5   | 0.9955 | 1–50   | 5   | 94.4  | 15.1 | 50 | 103.6 | 8.8  | –6.87  |
| 203 | Pinoxaden            | 2.5 | 0.9989 | 0.5–50 | 2.5 | 84.5  | 2.8  | 50 | 93.5  | 3.4  | 1      |
| 204 | Piperonyl butoxide   | 2.5 | 0.9973 | 0.5–50 | 2.5 | 78.4  | 1.4  | 50 | 101.3 | 1.4  | –4.36  |
| 205 | Piperophos           | 2.5 | 0.999  | 0.5–50 | 2.5 | 88.7  | 0.7  | 50 | 90.9  | 9.7  | 0.83   |

|     |                         |     |        |        |     |       |      |    |       |      |        |
|-----|-------------------------|-----|--------|--------|-----|-------|------|----|-------|------|--------|
| 206 | Pirimicarb              | 1   | 0.9998 | 0.5–50 | 1   | 75.9  | 9.8  | 50 | 97.1  | 0.8  | –20.86 |
| 207 | Pirimicarb-desmethyl    | 2.5 | 0.9991 | 0.5–50 | 2.5 | 102.9 | 1.1  | 50 | 85.2  | 3.7  | –40.13 |
| 208 | Pirimiphos-ethyl        | 5   | 0.9932 | 0.5–50 | 5   | 104.3 | 8.7  | 50 | 105.4 | 2.8  | –7.23  |
| 209 | Pirimiphos-methyl       | 1   | 0.9994 | 0.5–50 | 1   | 76.3  | 5    | 50 | 90.8  | 3.2  | –3.05  |
| 210 | Prochloraz              | 2.5 | 0.9985 | 0.5–50 | 2.5 | 103.2 | 16.1 | 50 | 98.8  | 3.4  | –0.03  |
| 211 | Profenofos              | 5   | 0.9989 | 0.5–50 | 5   | 91.1  | 11   | 50 | 89.8  | 13.9 | –4.03  |
| 212 | Promecarb               | 1   | 0.9998 | 0.5–50 | 1   | 98.3  | 7.8  | 50 | 97.8  | 3.2  | 2.26   |
| 213 | Prometryn               | 1   | 0.994  | 1–50   | 1   | 78.9  | 17.9 | 50 | 95.7  | 3.7  | 9.63   |
| 214 | Pronamide (Propyzamide) | 5   | 0.9924 | 0.5–50 | 5   | 87.4  | 4.7  | 50 | 101.3 | 0.1  | –0.36  |
| 215 | Propachlor              | 2.5 | 0.9992 | 0.5–50 | 2.5 | 90.4  | 0.9  | 50 | 100.9 | 3.7  | –9.21  |
| 216 | Propamocarb             | 1   | 1      | 0.5–50 | 1   | 85.2  | 1.4  | 50 | 92.7  | 0.4  | –32.29 |
| 217 | Propanil                | 2.5 | 0.9982 | 1–50   | 2.5 | 77.4  | 4    | 50 | 93    | 2.5  | –36.89 |
| 218 | Propaquizafop           | 2.5 | 0.9985 | 0.5–50 | 2.5 | 79.8  | 5.5  | 50 | 98    | 5.3  | –2.13  |
| 219 | Propargite              | 1   | 0.9995 | 0.5–50 | 1   | 78    | 1.6  | 50 | 98.5  | 0.1  | –37.43 |
| 220 | Propazine               | 1   | 0.9997 | 0.5–50 | 1   | 93.9  | 0.1  | 50 | 100.8 | 1.3  | –25.18 |
| 221 | Propiconazole           | 5   | 0.9983 | 0.5–50 | 5   | 95.2  | 2.8  | 50 | 99.8  | 5.5  | –8.65  |
| 222 | Propoxur                | 1   | 0.9999 | 0.5–50 | 1   | 107.2 | 16.3 | 50 | 103   | 0.8  | –16.85 |
| 223 | Proquinazid             | 1   | 0.9999 | 0.5–50 | 1   | 103.4 | 5.1  | 50 | 99.5  | 3.4  | –10.15 |
| 224 | Prothioconazole         | 2.5 | 0.9987 | 0.5–50 | 2.5 | 87.4  | 13.6 | 50 | 113.9 | 17.7 | 19.71  |
| 225 | Prothioconazole-desthio | 2.5 | 0.9994 | 1–50   | 2.5 | 91.1  | 3.9  | 50 | 100.7 | 11.5 | –2.45  |
| 226 | Pydiflumetofen          | 1   | 0.9997 | 0.5–50 | 1   | 89.4  | 10.3 | 50 | 93    | 5.2  | –8.5   |
| 227 | Pyracarbolid            | 5   | 0.9965 | 2–50   | 5   | 91.1  | 0.3  | 50 | 101.4 | 4.1  | –5.11  |
| 228 | Pyraclofos              | 10  | 0.9937 | 0.5–50 | 10  | 93.8  | 6.8  | 50 | 105.4 | 6.8  | –5.82  |
| 229 | Pyracilonil             | 2.5 | 0.9995 | 0.5–50 | 2.5 | 89.2  | 2    | 50 | 100.7 | 1.2  | –2.51  |
| 230 | Pyraclostrobin          | 1   | 0.9998 | 0.5–50 | 1   | 78.7  | 4.7  | 50 | 90.4  | 4.4  | 0      |
| 231 | Pyraflufen-ethyl        | 2.5 | 0.9976 | 0.5–50 | 2.5 | 81.1  | 2.6  | 50 | 96.3  | 5    | –1.7   |
| 232 | Pyraziflumid            | 2.5 | 0.999  | 0.5–50 | 2.5 | 90.8  | 8.8  | 50 | 98.5  | 6.2  | –9.11  |
| 233 | Pyrazolate              | 2.5 | 0.996  | 0.5–50 | 2.5 | 72.5  | 16   | 50 | 100.6 | 3    | –2.83  |
| 234 | Pyrazophos              | 2.5 | 0.9987 | 0.5–50 | 2.5 | 116.5 | 6.3  | 50 | 89.2  | 2.3  | 7.52   |
| 235 | Pyributicarb            | 1   | 0.999  | 0.5–50 | 1   | 101.8 | 5.7  | 50 | 87.1  | 1.8  | –8.91  |
| 236 | Pyridaben               | 1   | 0.9999 | 0.5–50 | 1   | 100.4 | 11.3 | 50 | 92.6  | 2.7  | –6.26  |
| 237 | Pyridalyl               | 2.5 | 0.9987 | 0.5–50 | 2.5 | 91.8  | 3.1  | 50 | 118.8 | 4.5  | 17.03  |
| 238 | Pyrifluquinazon         | 1   | 0.9997 | 0.5–50 | 1   | 83.2  | 19.8 | 50 | 92.5  | 3.7  | 11.9   |
| 239 | Pyrifthalid             | 2.5 | 0.9974 | 0.5–50 | 2.5 | 86.9  | 12.2 | 50 | 100.6 | 2.5  | –5.9   |
| 240 | Pyrimethanil            | 5   | 0.9987 | 0.5–50 | 5   | 100.1 | 5.7  | 50 | 92.5  | 0.1  | –10.39 |
| 241 | Pyrimidifen             | 5   | 0.9919 | 0.5–50 | 5   | 93.3  | 13.8 | 50 | 98.9  | 2.9  | –4.86  |
| 242 | Pyrimisulfan            | 2.5 | 0.9979 | 0.5–50 | 2.5 | 81.8  | 3.3  | 50 | 91.3  | 1.9  | 7.25   |
| 243 | Pyriproxyfen            | 5   | 0.9948 | 0.5–50 | 5   | 92.7  | 13.5 | 50 | 96.6  | 10.8 | –11.56 |
| 244 | Pyroquilon              | 2.5 | 0.9998 | 0.5–50 | 2.5 | 88.6  | 4.2  | 50 | 89.2  | 0.7  | –11.88 |
| 245 | Quinalphos              | 5   | 0.9949 | 0.5–50 | 5   | 95.4  | 6.4  | 50 | 91.7  | 4.8  | –10.52 |
| 246 | Quizalofop-ethyl        | 10  | 0.9922 | 0.5–50 | 10  | 94.6  | 8.9  | 50 | 95.3  | 8.9  | –7.53  |
| 247 | Simazine                | 2.5 | 0.998  | 0.5–50 | 2.5 | 94.3  | 1.4  | 50 | 99.2  | 2.2  | –12.7  |
| 248 | Simetryn                | 1   | 0.9999 | 0.5–50 | 1   | 92.3  | 6.2  | 50 | 100.6 | 5.3  | 7.19   |
| 249 | Spinetoram (J)          | 1   | 0.9993 | 0.5–50 | 1   | 95.5  | 7.8  | 50 | 93.5  | 9.2  | –1.6   |
| 250 | Spinetoram (L)          | 5   | 0.9967 | 0.5–50 | 5   | 98.1  | 7.9  | 50 | 94.5  | 10.7 | –2.8   |
| 251 | Spinosyn A              | 2.5 | 0.9988 | 0.5–50 | 2.5 | 70.9  | 3.3  | 50 | 90.8  | 10   | –33.98 |
| 252 | Spinosyn D              | 2.5 | 0.9996 | 0.5–50 | 2.5 | 89.3  | 9.2  | 50 | 88.2  | 17.3 | –3.82  |

|     |                           |     |        |        |     |       |      |    |       |      |        |
|-----|---------------------------|-----|--------|--------|-----|-------|------|----|-------|------|--------|
| 253 | Spirodiclofen             | 2.5 | 0.9998 | 0.5–50 | 2.5 | 90.7  | 7.5  | 50 | 106.4 | 4.4  | –40.83 |
| 254 | Spirotetramat-ketohydroxy | 5   | 0.9997 | 0.5–50 | 5   | 107.1 | 10.4 | 50 | 89.2  | 3.1  | 3.5    |
| 255 | Spirotetramat-monohydroxy | 2.5 | 0.9999 | 0.5–50 | 2.5 | 90.6  | 14   | 50 | 97.7  | 2.7  | 15.16  |
| 256 | Spiroxamine               | 2.5 | 0.9995 | 0.5–50 | 2.5 | 83.7  | 1.3  | 50 | 98.2  | 1.4  | –13.65 |
| 257 | Sulfentrazone             | 5   | 0.9996 | 0.5–50 | 5   | 98.4  | 6.7  | 50 | 96    | 8.1  | –18.38 |
| 258 | Sulfotep                  | 1   | 0.9999 | 0.5–50 | 1   | 76.9  | 13.6 | 50 | 85.5  | 4.1  | –7.82  |
| 259 | Sulfoxafloer              | 5   | 0.9999 | 1–50   | 5   | 81    | 10.1 | 50 | 95.5  | 0.6  | 23.35  |
| 260 | Sulprofos                 | 1   | 1      | 0.5–50 | 1   | 91.3  | 5.7  | 50 | 95    | 2.6  | –13.85 |
| 261 | TCMTB                     | 1   | 0.9994 | 0.5–50 | 1   | 102.1 | 8.7  | 50 | 85.1  | 7.8  | –10.25 |
| 262 | Tebufenpyrad              | 2.5 | 0.9988 | 0.5–50 | 2.5 | 74.3  | 8.9  | 50 | 92.8  | 9.1  | –12.54 |
| 263 | Tebuthiuron               | 1   | 1      | 0.5–50 | 1   | 77.8  | 14.4 | 50 | 94.4  | 1.1  | 2.75   |
| 264 | Tepraloxym                | 2.5 | 0.9987 | 0.5–50 | 2.5 | 75.8  | 11.8 | 50 | 94.8  | 2.5  | 4.71   |
| 265 | Terbutylazine             | 2.5 | 0.9968 | 0.5–50 | 2.5 | 76.8  | 5.6  | 50 | 96.6  | 0.6  | 2.93   |
| 266 | Terbutryn                 | 5   | 0.9933 | 1–50   | 5   | 93.5  | 4.1  | 50 | 88    | 7.5  | 0.58   |
| 267 | Tetrachlorvinphos         | 1   | 0.9994 | 0.5–50 | 1   | 104   | 0.9  | 50 | 100   | 3.9  | –16.55 |
| 268 | Tetraconazole             | 5   | 0.9991 | 0.5–50 | 5   | 88.8  | 14.1 | 50 | 107.1 | 9.7  | 3.75   |
| 269 | Thenylchlor               | 5   | 0.9963 | 0.5–50 | 5   | 82.4  | 7.4  | 50 | 98.8  | 1.9  | –19.83 |
| 270 | Thiabendazole             | 1   | 1      | 0.5–50 | 1   | 102.2 | 7.2  | 50 | 96.7  | 2.5  | –41.29 |
| 271 | Thiacloprid               | 2.5 | 0.9968 | 0.5–50 | 2.5 | 78.4  | 7.3  | 50 | 96.8  | 0.3  | –17.26 |
| 272 | Thidiazuron               | 1   | 0.9994 | 0.5–50 | 1   | 116.8 | 0.6  | 50 | 88.3  | 0.3  | –5.55  |
| 273 | Thifluzamide              | 5   | 0.9985 | 0.5–50 | 5   | 90.4  | 13   | 50 | 85.9  | 8.4  | –3.21  |
| 274 | Thiobencarb               | 1   | 1      | 0.5–50 | 1   | 83.8  | 3.3  | 50 | 96.8  | 1.6  | 21.86  |
| 275 | Thiodicarb                | 5   | 0.9984 | 0.5–50 | 5   | 97.7  | 7.8  | 50 | 92.2  | 4.3  | –2.41  |
| 276 | Thionazin                 | 5   | 0.9996 | 0.5–50 | 5   | 102.4 | 6    | 50 | 102   | 4.5  | 13.75  |
| 277 | Tiadinil                  | 5   | 0.9943 | 0.5–50 | 5   | 99.3  | 3.6  | 50 | 82.7  | 6.7  | –3.69  |
| 278 | Tolfenpyrad               | 1   | 0.9998 | 1–50   | 1   | 72.8  | 1.7  | 50 | 92.4  | 5.6  | –2.17  |
| 279 | Triadimefon               | 1   | 0.9999 | 1–50   | 1   | 86.8  | 1.4  | 50 | 98.8  | 0.9  | –29.58 |
| 280 | Triazophos                | 2.5 | 0.9903 | 0.5–50 | 2.5 | 92.2  | 13.8 | 50 | 97.3  | 1.6  | –1.11  |
| 281 | Tricyclazole              | 2.5 | 0.9986 | 0.5–50 | 2.5 | 83.5  | 0.6  | 50 | 99.5  | 1.3  | –9.68  |
| 282 | Trifloxystrobin           | 2.5 | 0.9984 | 0.5–50 | 2.5 | 81.7  | 5.1  | 50 | 94.8  | 5.6  | –5.24  |
| 283 | Triflumizole              | 2.5 | 0.9986 | 0.5–50 | 2.5 | 79.8  | 2.2  | 50 | 94.6  | 7.8  | –11.19 |
| 284 | Triflumuron               | 2.5 | 0.9987 | 1–50   | 2.5 | 95.5  | 0.9  | 50 | 100.4 | 13.2 | –3.15  |
| 285 | Triticonazole             | 5   | 0.9978 | 0.5–50 | 5   | 92.8  | 4    | 50 | 100.7 | 6.8  | –1.77  |
| 286 | Vamidothion               | 1   | 0.9988 | 0.5–50 | 1   | 78.1  | 14.3 | 50 | 97.9  | 0.4  | –31.02 |
| 287 | Zoxamide                  | 2.5 | 0.9979 | 0.5–50 | 2.5 | 97.4  | 8.5  | 50 | 95    | 11.1 | –6.76  |
